# Supplementary material
Source: PubMed Central journal article supplement (PMC3086882)
Supplement: NIHMS285794-supplement-1.pdf [file NIHMS285794-supplement-1.pdf]

# SUPPORTING ONLINE MATERIAL

## An integrative approach to reveal driver gene fusions from paired-end sequencing data in cancer

Xiao-Song Wang<sup>1, 2, 3</sup>, John R. Prensner<sup>1, 3, 8</sup>, Guoan Chen<sup>4, 8</sup>, Qi Cao<sup>1, 3</sup>, Bo Han<sup>1, 3</sup>, Saravana M Dhanasekaran<sup>1, 3</sup>, Rakesh Ponnala<sup>1</sup>, Xuhong Cao<sup>1, 3</sup>, Sooryanarayana Varambally<sup>1, 3, 7</sup>, Dafydd G. Thomas<sup>3</sup>, Thomas J. Giordano<sup>3</sup>, David G. Beer<sup>4</sup>, Nallasivam Palanisamy<sup>1, 3</sup>, Maureen A. Sartor<sup>2</sup>, Gilbert S. Omenn<sup>2#</sup>, Arul M. Chinnaiyan<sup>1, 2, 3, 5, 6, 7#</sup>

1. Michigan Center for Translational Pathology, Ann Arbor, MI, 48109, USA,
2. National Center for Integrative Biomedical Informatics, CCMB, MI, 48109, USA,
3. Department of Pathology, University of Michigan, Ann Arbor, MI, 48109, USA,
4. Department of Surgery, University of Michigan, Ann Arbor, MI, 48109, USA
5. Howard Hughes Medical Institute, University of Michigan Medical School, Ann Arbor, MI, 48109, USA
6. Department of Urology, University of Michigan, Ann Arbor, MI, 48109, USA,
7. Comprehensive Cancer Center, University of Michigan Medical School, Ann Arbor, MI, 48109, USA
8. These author contributed equally

#Address correspondence and requests for reprints to: Gilbert S. Omenn, M.D., Ph.D. & Arul M. Chinnaiyan, M.D., Ph.D.

**This PDF contains:**

**Supplementary Discussions**

**Supplementary Figure 1-9**

**Supplementary Table 1-11**

**References**

## **Supplementary Discussion**

### **The functional significance of fusion-interaction hubs and their potential as drug targets**

To explore the functional role of most significant shared interacting genes with the connecting fusion genes, we resolved the fusion-interaction network by setting the p value to  $10^{-7}$ . After spring-embedded relaxing using the VisANT program<sup>1</sup>, the FI network was spread into six major clusters, which join gene fusions from similar tumor entities (**Figure 1d**). The shared interacting genes with the greatest statistical significance in each subset of connected fusions were designated as fusion-interaction hubs in each cluster.

In cluster i, this approach identified *GATA3* as the hub for a subset of T cell receptor fusion partners -- *LYL1*, *TAL1*, *TAL2*, *LMO1* and *LMO2*, which are normally transcriptional cofactors for *GATA3*<sup>2</sup>. Whereas *MEIS1* was the center of another subset of *NUP98* fusion partners, the *HOX* family genes, which were reported to collaborate with *MEIS1* in AML transformation<sup>3</sup>. In clusters ii and iii, *CDK6* and *CTNNB1* join two distinct subsets of immunoglobulin fusion partners, exemplified by cyclins and *BCL* genes. Interestingly, *CDK6* is known to form a complex with cyclins, that phosphorylates and inhibits Rb; whereas *CTNNB1* is a known upstream protein of the *BCL* genes<sup>4</sup>. In cluster v, *PIK3R1* connects most of *BCR* and *ETV6* fusion partners. This suggested the central role of *PIK3R1* in mediating the signaling of these fusion proteins. *HDAC1*, the hub for a subset of *RUNX1* fusions in cluster iv, is normally a co-repressor of the *RUNX1* partners -- *RUNX1T1*, *CBFA2T3*, *MDS1* and *EVII*<sup>5</sup>. Moreover, *ERG* and *RPS6KA5* (*MSK1*) appear to be the hubs of *ESW1* fusions in cluster vi; the latter was reported to regulate *EWS1* partners -- *CREB1*, *ETV1* and *ATF1*<sup>6</sup>. The consistent functional relationship between a FI hub and a fusion partner family suggests this hub as a functional factor joining this family. This implies the role of FI hubs in mediating the function of the fusion proteins, and the potential benefits of mining for drug targets from shared interacting hubs to block multiple fusions. For example, HDAC1 is recruited by 3' partners of *RUNX1* resulting in dominant-negative effect over wild-type *RUNX1*<sup>7, 8</sup>, thus may be a potential target to block *RUNX1* fusions (**Figure 1d**).

The significance of the FI hubs in molecular targeting could be verified by the therapeutic effect of their ablating drugs on the specific tumor entities where the connected gene fusions occur. We therefore investigated the literature for the hubs that have blocking reagents, *PIK3R1*, *CDK6*, and *HDAC1*, according to the drug target database<sup>9</sup>. A most recent report revealed that *PIK3R1* and *PIK3R2* are the specific PI3K isoforms that mediate transformation of *BCR-ABL1* positive pre-B-ALL, and *PI3K* ablation by PI-103 can block *BCR-ABL* leukemogenesis in mice<sup>10</sup>. Moreover, the *HDAC1*-3 inhibitor, Vorinostat, was reported to be effective in AML patients by a recent study<sup>11</sup>, whereas Flavopiridol, an inhibitor of *CDKs*, was under clinical trial for the treatment of relapsed or refractory B cell lymphoma<sup>12</sup>.

### **The application of ConSig technology to deep sequencing data analysis**

The ConSig technology preferentially identifies biologically important genes in cancer. This is particularly useful in the analysis of a large number of putative chimeras generated by next generation sequencing data to filter secondary fusions. Of note, in this application, the main theme is to evaluate the biological relevance of putative chimeras, in stead of distinguishing fusions and mutations, whereby the radial ConSig will be more informative. This is especially important for evaluating the genes involved in both fusion and point mutations (mixed type cancer genes), for example, a fusion involving *EGFR* gene will be considered as biologically important because of the prior knowledge of *EGFR* point mutation in cancer.

Moreover, the 3' fusion partners display more distinctive signature concepts than the 5' partners (**Supplementary Fig. 4**), therefore the ConSig technology will be more discriminative in evaluating 3' genes. In

practice, we usually first rate the 3' partners of fusion chimeras by *r*ConSig scores, and then rate the 5' partners by *r*ConSig score to supplement this analysis.

### Confirmation of the fusion breakpoint principle

While the fusion breakpoint principle can be inferred based on conventional cytogenetics analysis, it should be stressed that the net output of high-throughput genomic measurement was different from G-banding and FISH, where the balanced genomic relocation information was lost. **Supplementary Fig. 6** demonstrates the possible complex chromosome rearrangements generating contradictory cases to the breakpoint principle on array CGH, but not on FISH data. For example, the THP-1 cell line harbors a MLL-AF9 fusion with duplication of the 3' MLL gene that deviates from the principle. Studying public spectral karyotyping data revealed complex translocations between chr9 and chr10 resulting in possible three-way fusions involving the MLL gene 13. For this reason, extensive evidence from large numbers of malignancies is required to confirm the prevalence of this principle on high-throughput genomic data.

To confirm this principle, we did a large-scale meta-analysis of unbalanced gene fusions based on high-resolution array CGH/SNP datasets annotated with gene fusions, as well as literature curation (**Table 2, Supplementary Fig. 5b**). We started with analyses of four independent leukemia datasets and two lymphoma datasets. Of 32 samples with 10 different unbalanced fusions in these datasets, 31 follow the principle. Analyses of the known fusions in mesenchymal and epithelial tumors also yielded strong supporting evidences. In four sarcoma datasets, three unbalanced fusions were identified in 23 samples, including *EWSR1-FLI1* in Ewing's sarcoma, *COL1A1-PDGFB* fusion in dermatofibrosarcoma protuberans (DFSP), and *ASPSCR1-TFE3* in alveolar soft part sarcoma (ASPS). None of these contradict the principle. In salivary adenoma, a *FGFR1-PLAG1* fusion is found with interstitial duplications<sup>14</sup>, whereas *TMPRSS2-ERG* fusion in prostate cancer is frequently reported having heterozygous deletions<sup>15,16</sup>. This finding is noteworthy because both are intra-chromosome gene fusions, but the genomic placements of genes in the two fusions are clearly opposite. This clearly demonstrated the inferred principle. The same pattern was also observed in the recurrent *KIAA1549-BRAF* fusion in astrocytoma (AST)<sup>17</sup>. Furthermore, we analyzed the reports for all unbalanced intra-chromosome fusions from the Mitelman database<sup>18</sup>, and confirmed that the inferred principle is the adherent genetic factor that determines the nature of genomic imbalances associated with these fusions (**Supplementary Table 9**).

To further test this principle on prostate cancer, where unbalanced fusions are less studied by conventional cytogenetics, we reviewed all fluorescence *in situ* hybridization that our lab has performed on prostate cancer for *ETS* family gene fusions with break-apart probes. A total of 60 samples with 5 unbalanced *ETS* fusions were found from 238 prostate cancer samples, including *TMPRSS2-ERG*, *TMPRSS2-ETV4*, *C15orf21-ETV1*, *HNRP-ETV1*, and *CANT1-ETV4*; no contradictory case was identified (**Supplementary Fig. 5c, and Supplementary Table 10**).

## Supplementary Figures

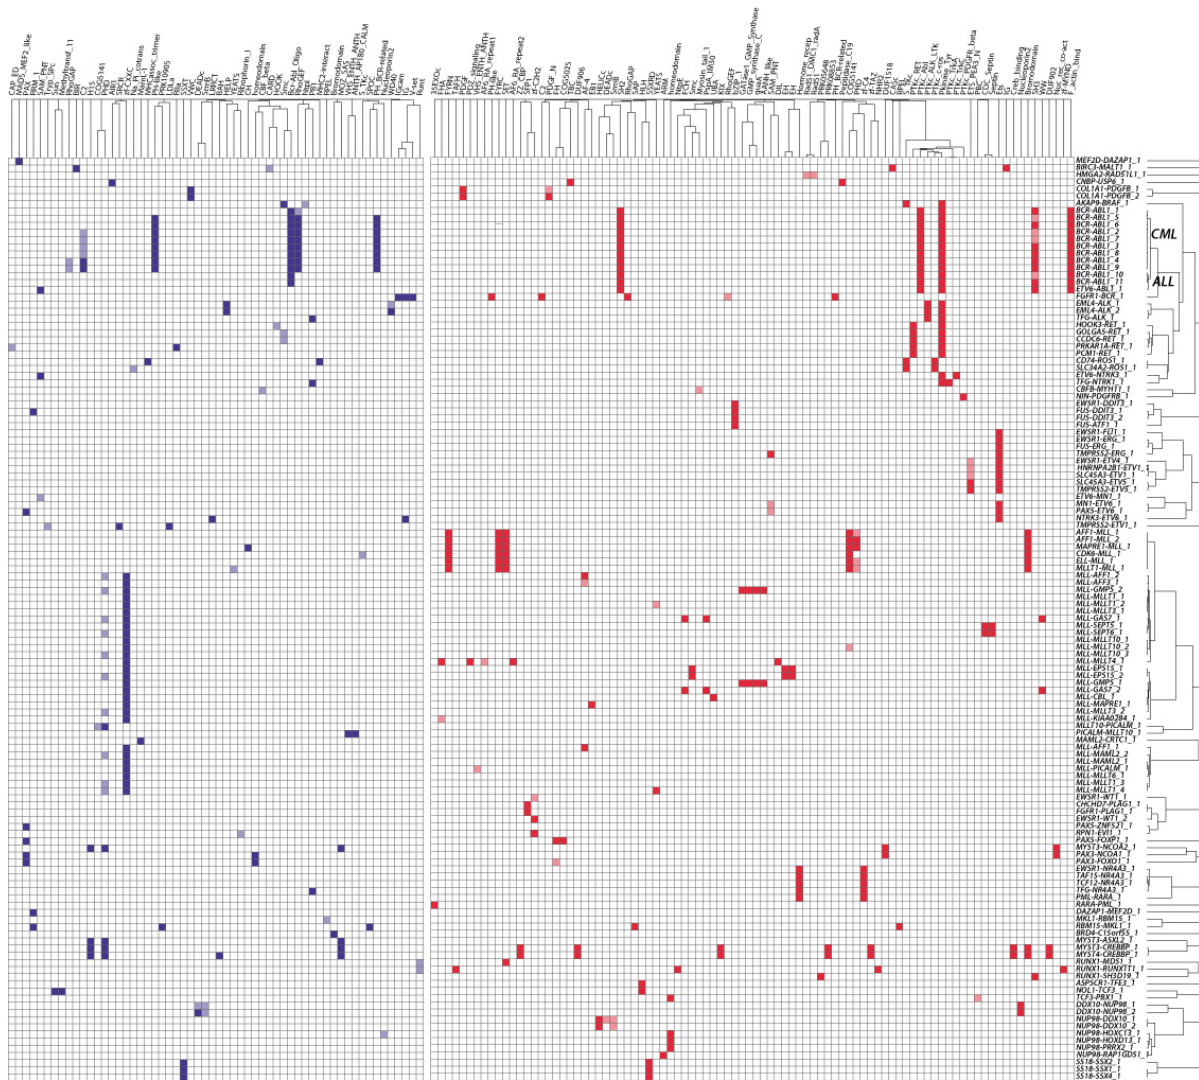

**Supplementary Figure 1. The domain architectures of known gene fusions.** Domains for known fusion genes were clustered according to their sequence similarity (columns), while the gene fusions were clustered according to their domain similarity (rows). The domains from the 5' partners are colored blue (left panel), and domains from 3' partners red (right panel). The proportion of each domain retained in the fusion protein is indicated by the saturation of the colors (ranging from 0~100%). The different domain patterns from the same gene fusion originated from different translocation breakpoints were labeled with different numbers, e.g. “BCR-ABL1\_1”. The sequences associated with each domain pattern were listed in Supplementary Table 1.

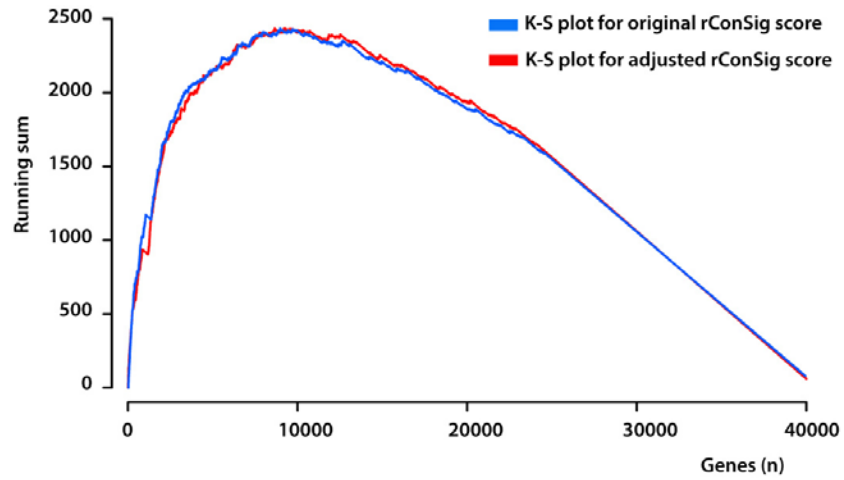

**Supplementary Figure 2. Kolmogorov-Smirnov (K-S) analysis for the known cancer genes based on the rConSig-score with or without the pathways significantly overlapping with the molecular interactions ( $p < 0.01$ ).**

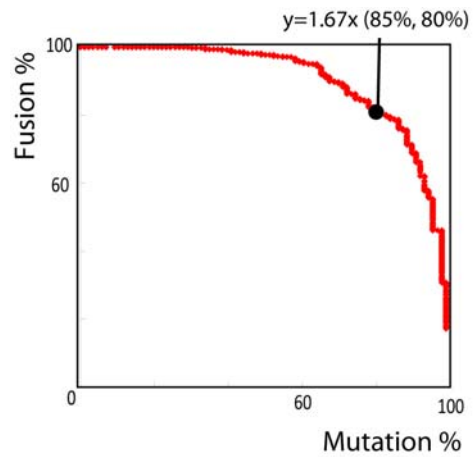

**Supplementary Figure 3. The D-line  $y=kx$  ( $k=1.67$ ) of the fusion-mutation ConSig plot was determined by setting optimal separation capacity. The D-line separates 85% of mutation genes from 80% of fusion genes. This plot was generated by calculating the separation capacity by increasing the k value from 0 to 20.**







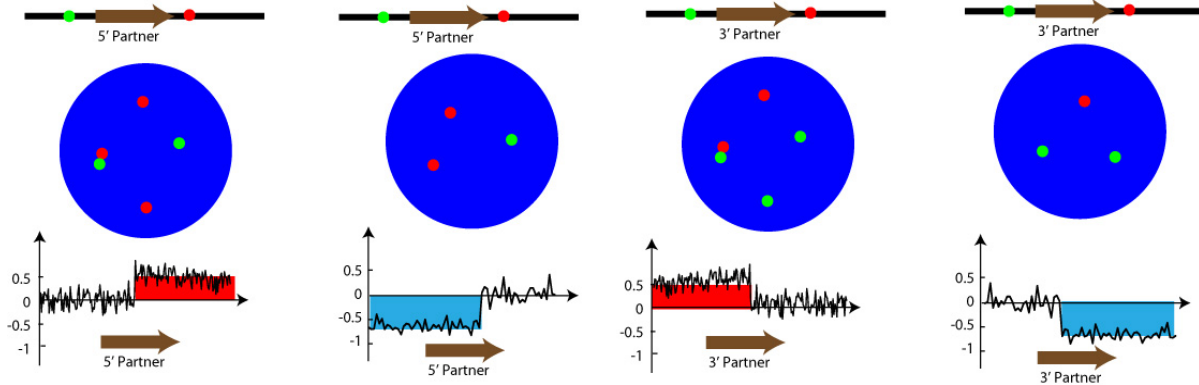

**Supplementary Figure 6. Complex chromosome rearrangements generate contradictory cases to the breakpoint principle on array CGH, but not on FISH data.** Upper panel shows the location of FISH probes (green and red dots) on the genomic loci of 5' or 3' partner genes (grey arrows). The middle panel shows the FISH appearance of complex chromosome rearrangements resulting in a balanced fusion (split signal) and an unbalanced translocation (from left to right: 3' duplication, 5' deletion, 5' duplication, 3' deletion). The lower panel shows the relative quantification of DNA copy number data generated by microarray CGH analysis from the genomic regions 1Mb apart from the fusion genes. The x axis indicates the physical position of the genomic aberrations. The fusion partners are indicated by grey arrows.

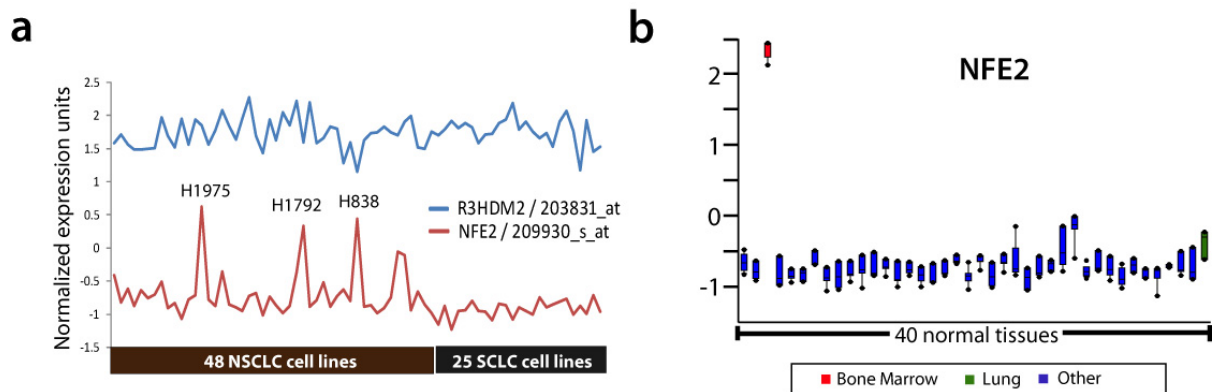

**Supplementary Figure 7. Gene expression profile of *R3HDM2* and *NFE2*.** (a) Microarray expression data of *R3HDM2* and *NFE2* on lung cancer cell lines. Figure shows the normalized expression units in all profiled lung cancer cell lines (Richard Wooster et al. gene expression study<sup>19</sup>). Visualization tools incorporated in OncoPrint<sup>20</sup> were used to generate graphical displays. The cell lines that have marked over-expression of *NFE2* are indicated. (b) The expression of *NFE2* in 40 distinct normal tissues using OncoPrint (Dataset: Both\_Normal; probe: 209930\_s\_at). See Supplementary Table 12 for tissue classes. Expression (in normalized expression units) in 40 distinct normal tissues is shown (normal lung, green; bone marrow, red). Box and whisker plots show median +/- 90th%/10th%.

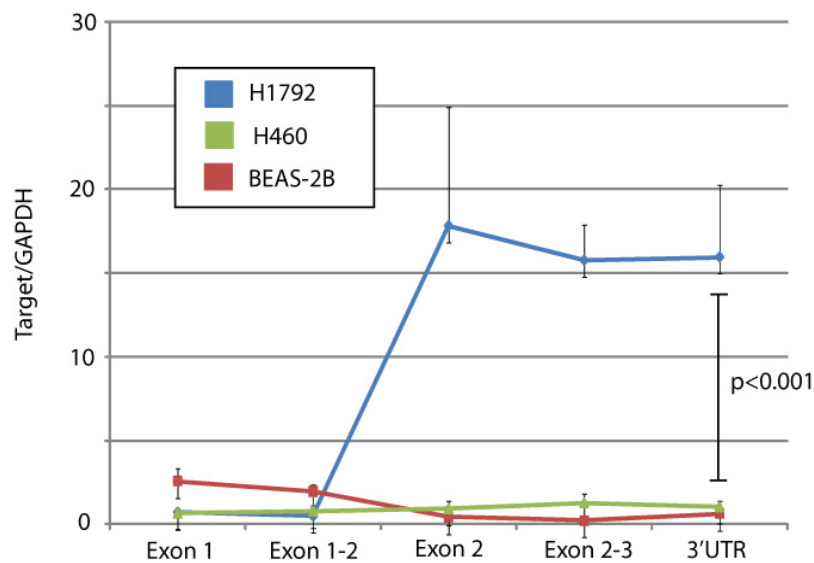

**Supplementary Figure 8. Exon-walking RT-PCR reveals specific overexpression of *NFE2* coding exons.**

Exon-walking qRT-PCR with primer pairs corresponding to the indicated exons were used to evaluate exon-level expression changes in *NFE2*. The *R3HDM2-NFE2* fusion is predicted to join untranslated promoter sequences of *R3HDM2* with the coding exons of *NFE2* (exons 2-3, with exon 1 being an untranslated sequence in *NFE2*), resulting in the indicated overexpression of only *NFE2* coding exons. The H460 lung cancer cell line and BEAS-2B normal cells showed low endogenous *NFE2* levels. Primer pairs used are listed in **Supplementary Table 3**.

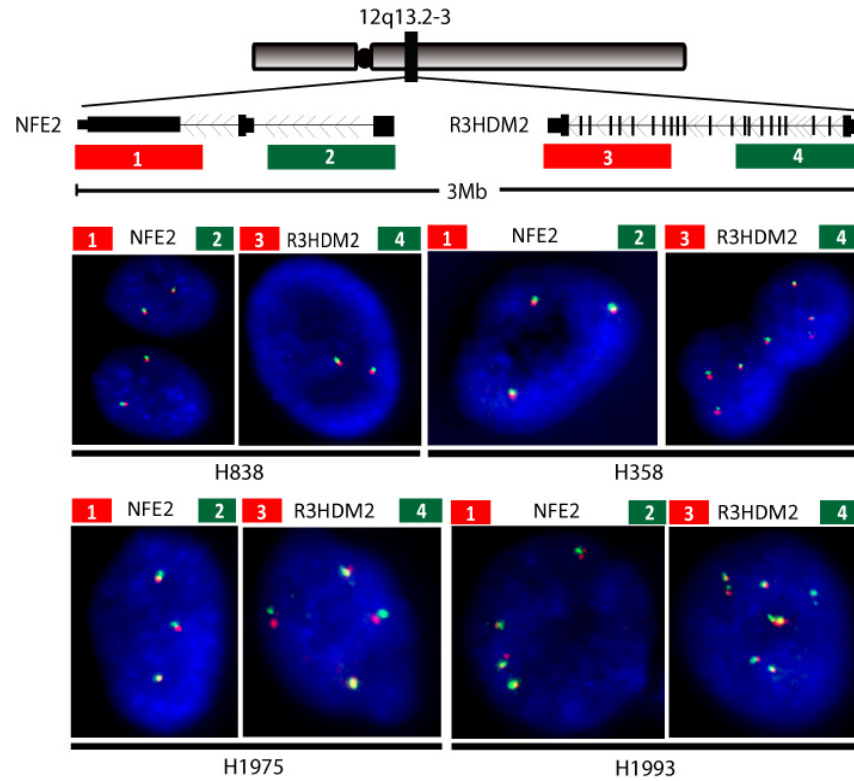

**Supplementary Figure 9. FISH analysis of *NFE2* and *R3HDM2* loci by split probes strategy on selected lung cancer cell lines.** Upper, the genomic organizations of *NFE2* and *R3HDM2* loci were shown in the schematic, with red and green bars indicating the location of BAC clones. Lower, interphase FISH analysis with *NFE2* and *R3HDM2* split probes showing normal co-localizing signals on H1975, H838, H358, and H1993 cell lines. H1975, H838 and H358 are three additional cell lines with *NFE2* over-expression; H1993 is a cell line that has relatively low *NFE2* expression. BAC clone probes: 1, RP11-621J12; 2, RP11-753H16; 3, RP11-799O6; 4, RP11-258J5.

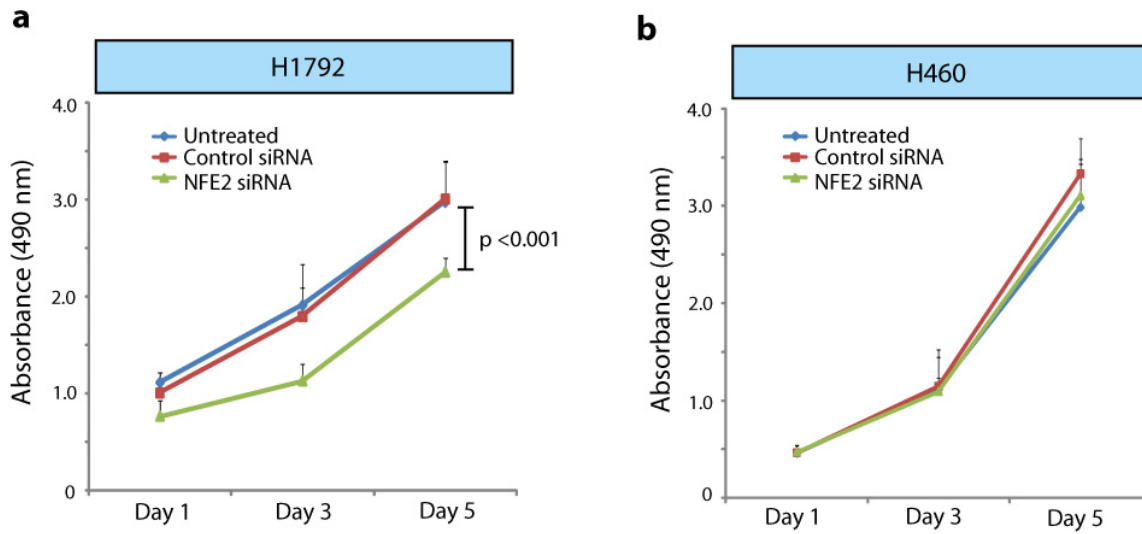

**Supplementary Figure 10. WST-1 assay shows inhibited cell proliferation after the *NFE2* knockdown on H1792 cell line, but not on the control cell line H460.** (a). *NFE2* knockdown inhibits cell proliferation on H1792 cell line expressing the *R3HDM3-NFE2* fusion by a WST-1 assay (absorbance at 490nm was measured). (b) *NFE2* knockdown on H460 cell line with low level *NFE2* expression did not have significant effect on cell proliferation.

## Supplementary Tables

**Supplementary Table 1. Genbank sequences suggesting distinct domain patterns of known gene fusions.** Each domain pattern was defined as the unique domain architecture generated by the fusion of two wild-type proteins; fusion of the same gene partners could generate different domain patterns due to the difference of fusion breakpoints.

| <b>Fusion</b>        | <b>Pattern No.</b> | <b>Genbank Accessions</b>                                                                |
|----------------------|--------------------|------------------------------------------------------------------------------------------|
| <i>AFF1-MLL</i>      | 1                  | AF487906;AF492831;                                                                       |
| <i>AFF1-MLL</i>      | 2                  | AF177238;AF177239;                                                                       |
| <i>AKAP9-BRAF</i>    | 1                  | AY803272;                                                                                |
| <i>ASPSCR1-TFE3</i>  | 1                  | AY034077;                                                                                |
| <i>BCR-ABL1</i>      | 1                  | AM491362 (e6a2);                                                                         |
| <i>BCR-ABL1</i>      | 2                  | EU236680(e14a3);S72478(e14a3);                                                           |
| <i>BCR-ABL1</i>      | 3                  | EU216071(e14a2,Y5);M25946(e14a2,K562,CML);M30829(e14a2,K562);<br>M30832(e14a2, EM2,CML); |
| <i>BCR-ABL1</i>      | 4                  | AF487522(e18a2,CML);                                                                     |
| <i>BCR-ABL1</i>      | 5                  | AM491359(e13a3);AY043457(e13a3,CML);                                                     |
| <i>BCR-ABL1</i>      | 6                  | AJ131467(e13a2);EF158045(e13a2, SCA and CML);EU216066(e13a2,<br>CML);                    |
| <i>BCR-ABL1</i>      | 7                  | AM491360(e14a3);                                                                         |
| <i>BCR-ABL1</i>      | 8                  | AJ131466(e14a2);M13096(e14a2,K562);                                                      |
| <i>BCR-ABL1</i>      | 9                  | AM491363(e19a2);                                                                         |
| <i>BCR-ABL1</i>      | 10                 | AM491361(e1a3);S72479(e1a3,ALL);                                                         |
| <i>BCR-ABL1</i>      | 11                 | AF113911(e1a2);M17541(e1a2,ALL);M19730(e1a2,ALL);<br>X06418(e1a2,ALL);X07537(e1a2, ALL)  |
| <i>BIRC3-MALT1</i>   | 1                  | AF123094;                                                                                |
| <i>BRD4-C15orf55</i> | 1                  | AY166680;                                                                                |
| <i>CBFB-MYH11</i>    | 1                  | AF249897;AF249898;                                                                       |
| <i>CCDC6-RET</i>     | 1                  | D90075;                                                                                  |
| <i>CD74-ROS1</i>     | 1                  | EU236945;                                                                                |
| <i>CDK6-MLL</i>      | 1                  | AF492830;                                                                                |
| <i>CHCHD7-PLAG1</i>  | 1                  | DQ478931;DQ478932;                                                                       |
| <i>CNBP-USP6</i>     | 1                  | AY624556;                                                                                |
| <i>COL1A1-PDGFB</i>  | 1                  | X98709;X98710;Y15913;Y15917;Y15918;Y15919;Y15921;                                        |
| <i>COL1A1-PDGFB</i>  | 2                  | X98707;X98708;Y08643;Y15914;Y15915;Y15916;Y15920;Y16346;                                 |
| <i>DAZAPI-MEF2D</i>  | 1                  | AY678451;                                                                                |
| <i>DDX10-NUP98</i>   | 1                  | AB001342;                                                                                |
| <i>DDX10-NUP98</i>   | 2                  | AB001343;                                                                                |
| <i>ELL-MLL</i>       | 1                  | DQ437655;                                                                                |
| <i>EML4-ALK</i>      | 1                  | AB274722;                                                                                |
| <i>EML4-ALK</i>      | 2                  | AB275889;                                                                                |

|                       |   |                                       |
|-----------------------|---|---------------------------------------|
| <i>ETV6-ABL1</i>      | 1 | Z35761;                               |
| <i>ETV6-MN1</i>       | 1 | X85024;X85026;                        |
| <i>ETV6-NTRK3</i>     | 1 | AF041811;AF125808;                    |
| <i>EWSR1-DDIT3</i>    | 1 | X92120;                               |
| <i>EWSR1-ERG</i>      | 1 | S72621;S72622;S72865;                 |
| <i>EWSR1-ETV4</i>     | 1 | U35622;                               |
| <i>EWSR1-FLI1</i>     | 1 | AF327066;S62665;S72620;               |
| <i>EWSR1-NR4A3</i>    | 1 | AF524261;S81242;                      |
| <i>EWSR1-WT1</i>      | 1 | S74529;                               |
| <i>EWSR1-WT1</i>      | 2 | S79672;                               |
| <i>FGFR1-BCR</i>      | 1 | AJ298917;                             |
| <i>FGFR1-PLAG1</i>    | 1 | EF525168;EF525169;                    |
| <i>FUS-ATF1</i>       | 1 | AJ295163;                             |
| <i>FUS-DDIT3</i>      | 1 | AJ301611;                             |
| <i>FUS-DDIT3</i>      | 2 | AJ301612;S62138;S75762;S75763;X71427; |
| <i>FUS-ERG</i>        | 1 | S77574;                               |
| <i>GOLGA5-RET</i>     | 1 | X15786;                               |
| <i>HMGA2-RAD51L1</i>  | 1 | AY138857;AY138858;AY138859;           |
| <i>HNRNPA2B1-ETV1</i> | 1 | EF632110;                             |
| <i>HOOK3-RET</i>      | 1 | DQ104207;                             |
| <i>MAML2-CRTC1</i>    | 1 | AY186998;                             |
| <i>MAPRE1-MLL</i>     | 1 | AY752859;                             |
| <i>MEF2D-DAZAP1</i>   | 1 | AY675556;                             |
| <i>MKL1-RBM15</i>     | 1 | AF364036;                             |
| <i>MLL-AFF1</i>       | 1 | AF024541;AF177236;AF177237;DQ451148;  |
| <i>MLL-AFF1</i>       | 2 | AF031404;AF487905;AF492832;S67825;    |
| <i>MLL-AFF3</i>       | 1 | AF422798;                             |
| <i>MLL-CBL</i>        | 1 | AY125965;                             |
| <i>MLL-EPS15</i>      | 1 | AF331760;                             |
| <i>MLL-EPS15</i>      | 2 | AY187922;                             |
| <i>MLL-GAS7</i>       | 1 | AF231998;AF231999;                    |
| <i>MLL-GAS7</i>       | 2 | AF231995;AF231996;AF231997;           |
| <i>MLL-GMPS</i>       | 1 | AF297746;AF297748;                    |
| <i>MLL-GMPS</i>       | 2 | AF297747;AF297749;                    |
| <i>MLL-KIAA0284</i>   | 1 | AM422012;                             |
| <i>MLL-MAML2</i>      | 1 | AJ972402;DQ084494;DQ886023;           |
| <i>MLL-MAML2</i>      | 2 | DQ886024;                             |
| <i>MLL-MAPRE1</i>     | 1 | AY752858;                             |
| <i>MLL-MLLT1</i>      | 1 | DQ224341;                             |
| <i>MLL-MLLT1</i>      | 2 | AF331759;AY040555;                    |
| <i>MLL-MLLT1</i>      | 3 | DQ224342;                             |
| <i>MLL-MLLT1</i>      | 4 | AY187921;                             |

|                       |   |                                                       |
|-----------------------|---|-------------------------------------------------------|
| <i>MLL-MLLT10</i>     | 1 | AF272375;AF272383;                                    |
| <i>MLL-MLLT10</i>     | 2 | AY187923;                                             |
| <i>MLL-MLLT10</i>     | 3 | AF272376;AF272384;AF272385;                           |
| <i>MLL-MLLT3</i>      | 1 | EF406122;                                             |
| <i>MLL-MLLT3</i>      | 2 | S82034;                                               |
| <i>MLL-MLLT4</i>      | 1 | DQ387206;                                             |
| <i>MLL-MLLT6</i>      | 1 | S72604;                                               |
| <i>MLL-PICALM</i>     | 1 | AF477006;                                             |
| <i>MLL-SEPT5</i>      | 1 | AF061154;                                             |
| <i>MLL-SEPT6</i>      | 1 | AF450279;AF512943;AF512944;AF512945;AF512946;         |
| <i>MLLT10-PICALM</i>  | 1 | AF060927;AF060930;AF060931;                           |
| <i>MLLT1-MLL</i>      | 1 | AF373587;                                             |
| <i>MNI-ETV6</i>       | 1 | X85025;X85027;                                        |
| <i>MYST3-ASXL2</i>    | 1 | AB084281;                                             |
| <i>MYST3-CREBBP</i>   | 1 | AJ251843;                                             |
| <i>MYST3-NCOA2</i>    | 1 | EF374064;                                             |
| <i>MYST4-CREBBP</i>   | 1 | AJ299261;                                             |
| <i>NIN-PDGFRB</i>     | 1 | AY764156;                                             |
| <i>NOL1-TCF3</i>      | 1 | EU155120;                                             |
| <i>NTRK3-ETV6</i>     | 1 | AF125809;                                             |
| <i>NUP98-DDX10</i>    | 1 | AB000267;                                             |
| <i>NUP98-DDX10</i>    | 2 | AB000268;                                             |
| <i>NUP98-HOXC13</i>   | 1 | AJ438986;                                             |
| <i>NUP98-HOXD13</i>   | 1 | AB038155;                                             |
| <i>NUP98-PRRX2</i>    | 1 | AY662674;                                             |
| <i>NUP98-RAP1GDS1</i> | 1 | AF133331;AF133332;                                    |
| <i>PAX3-FOXO1</i>     | 1 | AF178854;BC008826;U02308;U02368;                      |
| <i>PAX3-NCOA1</i>     | 1 | AY633656;                                             |
| <i>PAX5-ETV6</i>      | 1 | DQ841178;                                             |
| <i>PAX5-FOXP1</i>     | 1 | DQ845346;                                             |
| <i>PAX5-ZNF521</i>    | 1 | DQ845345;                                             |
| <i>PCM1-RET</i>       | 1 | AJ297349;                                             |
| <i>PICALM-MLLT10</i>  | 1 | EF051633;                                             |
| <i>PML-RARA</i>       | 1 | M73779;S50916;                                        |
| <i>PRKARIA-RET</i>    | 1 | L03357;                                               |
| <i>RARA-PML</i>       | 1 | M82827;                                               |
| <i>RBM15-MKLI</i>     | 1 | AJ303089;                                             |
| <i>RPN1-EVII</i>      | 1 | AF310158;                                             |
| <i>RUNX1-MDS1</i>     | 1 | S69002;                                               |
| <i>RUNX1-RUNXITI</i>  | 1 | AX813476;AX813478;D13979;D14822;D14823;S78158;S78159; |
| <i>RUNX1-SH3D19</i>   | 1 | EU093086;EU093087;                                    |
| <i>SLC34A2-ROS1</i>   | 1 | EU236946;EU236947;                                    |



|                     |   |                             |
|---------------------|---|-----------------------------|
| <i>SLC45A3-ETV1</i> | 1 | EF632109;                   |
| <i>SLC45A3-ETV5</i> | 1 | EU314932;                   |
| <i>SS18-SSX1</i>    | 1 | S79325;                     |
| <i>SS18-SSX2</i>    | 1 | X79200;                     |
| <i>SS18-SSX4</i>    | 1 | AF114234;                   |
| <i>TAF15-NR4A3</i>  | 1 | AF162670;AJ243810;AJ245932; |
| <i>TCF12-NR4A3</i>  | 1 | AF289510;                   |
| <i>TCF3-PBX1</i>    | 1 | AY311345;M31522;            |
| <i>TFG-ALK</i>      | 1 | AF125093;AF143407;AF390893; |
| <i>TFG-NR4A3</i>    | 1 | AY532911;                   |
| <i>TFG-NTRK1</i>    | 1 | X85960;                     |
| <i>TMPRSS2-ERG</i>  | 1 | DQ204773;DQ831522;EU090248; |
| <i>TMPRSS2-ETV1</i> | 1 | DQ204770;                   |
| <i>TMPRSS2-ETV5</i> | 1 | EU314929;EU314930;EU314931; |

**Supplementary Table 2. Top hub genes shared by 3'fusion partner families as revealed by significant overlapping statistics.** “x, k, N” correspond to the variables demonstrated in the algorithm of hypergeometric statistics (Figure 1a)

| 5'Partner    | 3'partners(x) | Hub Genes     | 3'partners binding the hubs (k) | Total interacting genes of the hub gene (N) | P value  |
|--------------|---------------|---------------|---------------------------------|---------------------------------------------|----------|
| <i>NUP98</i> | 20            | <i>MEIS1</i>  | 6                               | 21                                          | 3.77E-16 |
| <i>IGL@</i>  | 11            | <i>CDK6</i>   | 4                               | 20                                          | 1.52E-11 |
| <i>MYST3</i> | 3             | <i>CARM1</i>  | 3                               | 11                                          | 1.57E-11 |
| <i>IGH@</i>  | 36            | <i>RUNX1</i>  | 5                               | 25                                          | 2.36E-11 |
| <i>IGL@</i>  | 11            | <i>RUNX1</i>  | 4                               | 25                                          | 3.96E-11 |
| <i>IGL@</i>  | 11            | <i>DMTF1</i>  | 3                               | 4                                           | 6.26E-11 |
| <i>BCR</i>   | 4             | <i>PIK3R1</i> | 4                               | 126                                         | 9.54E-11 |
| <i>TRD@</i>  | 8             | <i>GATA3</i>  | 3                               | 7                                           | 1.86E-10 |
| <i>MYST3</i> | 3             | <i>HIF1A</i>  | 3                               | 29                                          | 3.47E-10 |
| <i>TRB@</i>  | 15            | <i>LMO1</i>   | 3                               | 6                                           | 8.63E-10 |
| <i>EWSR1</i> | 13            | <i>ERG</i>    | 3                               | 7                                           | 9.49E-10 |
| <i>IGL@</i>  | 11            | <i>CDKN1A</i> | 4                               | 55                                          | 1.06E-09 |
| <i>MYST3</i> | 3             | <i>NCOA2</i>  | 3                               | 44                                          | 1.26E-09 |
| <i>IGH@</i>  | 36            | <i>CTNNB1</i> | 6                               | 122                                         | 1.30E-09 |
| <i>IGL@</i>  | 11            | <i>AKAP8</i>  | 3                               | 9                                           | 1.31E-09 |
| <i>TRB@</i>  | 15            | <i>GATA3</i>  | 3                               | 7                                           | 1.51E-09 |

**Supplementary Table 3. PCR primers used in this study.**

| Primer                                | Accession Number    | Refseq (ucsc)     | Type    | Sequence (5'→3')           |
|---------------------------------------|---------------------|-------------------|---------|----------------------------|
| R3HDM2-NFE2 fusion (exon 2 to exon 2) | NM_014925-NM_006163 | uc001snt-uc001sfq | Forward | ACTCATGGAGGCTGAGCATT       |
| R3HDM2-NFE2 fusion (exon 2 to exon 2) | NM_014925-NM_006163 | uc001snt-uc001sfq | Reverse | AGCTCGGTGATGGACATGAT       |
| NFE2 (exon 1)                         | NM_006163           | uc001sfq          | Forward | AGCAGGGTGACCCCTGATGTTGCC   |
| NFE2 (exon 1)                         | NM_006163           | uc001sfq          | Reverse | ACTCCCCAAACTGTTTTCTGGCT    |
| NFE2 (exon 1 - exon 2)                | NM_006163           | uc001sfq          | Forward | AGCAGGGTGACCCCTGATGTTGCC   |
| NFE2 (exon 1 - exon 2)                | NM_006163           | uc001sfq          | Reverse | TGGTCCAGGTTCCCGAAAGCCCA    |
| NFE2 (exon 2)                         | NM_006163           | uc001sfq          | Forward | TGGCCAGTAGGATGTCCCGTGT     |
| NFE2 (exon 2)                         | NM_006163           | uc001sfq          | Reverse | GTGGACAGCTGTATCACCTGTTCT   |
| NFE2 (exon 2 - exon 3)                | NM_006163           | uc001sfq          | Forward | TCCCCAGCAGAGCAGGAACAGGGTGA |
| NFE2 (exon 2 - exon 3)                | NM_006163           | uc001sfq          | Reverse | AAGGTATGGAGCTGGGGCTGGGGCT  |
| NFE2 (3'UTR)                          | NM_006163           | uc001sfq          | Forward | CTGAATCTCTTGAGCTGGAGG      |
| NFE2 (3'UTR)                          | NM_006163           | uc001sfq          | Reverse | GCTGGCAAGGTATAGTTGGAGT     |
| GAPDH                                 | NM_002046           | -                 | Forward | TGCACCACCAACTGCTTAGC       |
| GAPDH                                 | NM_002046           | -                 | Reverse | GGCATGGACTGTGGTCATGAG      |

**Supplementary Table 4. The summary of gene fusions reported in the leukemia array SNP dataset (GSE9113)**

| 5' Partner  | 5' Partner Cytoband | 3' Partner    | 3' Partner Cytoband | Total Fusion Samples (n) | Unbalanced Fusions (n) | Unbalanced/Total % |
|-------------|---------------------|---------------|---------------------|--------------------------|------------------------|--------------------|
| <i>BCR</i>  | 22q11.23            | <i>ABL1</i>   | 9q34.12             | 43 ALL<br>23 CML         | 9 ALL<br>5 CML         | 21.2               |
| <i>ETV6</i> | 12p13.2             | <i>RUNX1</i>  | 21q22.12            | 48                       | 17                     | 35.4               |
| <i>MLL</i>  | 11q23.3             | Multiple      |                     | 22                       | 5                      | 22.7               |
| <i>TCF3</i> | 19p13.3             | <i>PBX1</i>   | 1q23.3              | 17                       | 16                     | 94.1               |
| <i>PAX5</i> | 9p13.2              | <i>ETV6</i>   | 12p13.2             | 2                        | 2                      | 100                |
| <i>PAX5</i> | 9p13.2              | <i>FOXP1</i>  | 3p14.1              | 1                        | 1                      | 100                |
| <i>PAX5</i> | 9p13.2              | <i>ZNF521</i> | 18q11.2             | 1                        | 1                      | 100                |

**Supplementary Table 5. Analysis of the genomic imbalances associated with each gene fusion identified from the leukemia array SNP dataset (GSE9113).** Note: “N”, no change; “amp”, amplification; “del”, deletion; “T”, telomere; “C”, centromere; “->” denotes the other end of the segmental deletion or amplification not generating the fusion. The case contradicting the fusion breakpoint principle was marked with bold and italic.

| GEO accession | SAMPLE_ID | FUSION         | Copy number abberation at 5' gene locus | Copy number abberation at 3' gene locus |
|---------------|-----------|----------------|-----------------------------------------|-----------------------------------------|
| GSM235572     | #1        | <i>BCR-ABL</i> | N                                       | N                                       |
| GSM235734     | #10       | <i>BCR-ABL</i> | N                                       | N                                       |
| GSM235735     | #11       | <i>BCR-ABL</i> | 5'amp->T;3'del->Rgr                     | 5'del->PPP2R4;3'amp->T                  |
| GSM235736     | #12       | <i>BCR-ABL</i> | N                                       | N                                       |
| GSM235738     | #13       | <i>BCR-ABL</i> | N                                       | N                                       |
| GSM235740     | #14       | <i>BCR-ABL</i> | 5'amp->T                                | 3'amp->T                                |
| GSM235743     | #15       | <i>BCR-ABL</i> | N                                       | N                                       |
| GSM235747     | #16       | <i>BCR-ABL</i> | 3'del->LOC649264                        | N                                       |
| GSM235751     | #17       | <i>BCR-ABL</i> | N                                       | N                                       |
| GSM235753     | #18       | <i>BCR-ABL</i> | N                                       | N                                       |
| GSM235801     | #19       | <i>BCR-ABL</i> | N                                       | N                                       |
| GSM235617     | #2        | <i>BCR-ABL</i> | 5'amp->T                                | 3'amp->T                                |
| GSM235809     | #20       | <i>BCR-ABL</i> | N                                       | N                                       |
| GSM235865     | #21       | <i>BCR-ABL</i> | N                                       | N                                       |
| GSM235810     | #22       | <i>BCR-ABL</i> | N                                       | N                                       |
| GSM235713     | #23       | <i>BCR-ABL</i> | N                                       | N                                       |
| GSM235714     | #24       | <i>BCR-ABL</i> | N                                       | N                                       |
| GSM235715     | #25       | <i>BCR-ABL</i> | N                                       | N                                       |
| GSM235716     | #26       | <i>BCR-ABL</i> | N                                       | N                                       |
| GSM235717     | #27       | <i>BCR-ABL</i> | N                                       | N                                       |
| GSM235718     | #28       | <i>BCR-ABL</i> | N                                       | N                                       |
| GSM235719     | #29       | <i>BCR-ABL</i> | N                                       | N                                       |
| GSM235645     | #3        | <i>BCR-ABL</i> | N                                       | N                                       |
| GSM235720     | #30       | <i>BCR-ABL</i> | N                                       | N                                       |
| GSM235721     | #31       | <i>BCR-ABL</i> | N                                       | N                                       |
| GSM235722     | #32       | <i>BCR-ABL</i> | N                                       | N                                       |
| GSM235723     | #33       | <i>BCR-ABL</i> | N                                       | N                                       |
| GSM235724     | #34       | <i>BCR-ABL</i> | 5'amp->MAPK1                            | 3'amp->Chr9:133236046                   |
| GSM235725     | #35       | <i>BCR-ABL</i> | N                                       | N                                       |
| GSM235726     | #36       | <i>BCR-ABL</i> | N                                       | N                                       |
| GSM235727     | #37       | <i>BCR-ABL</i> | N                                       | N                                       |
| GSM235728     | #38       | <i>BCR-ABL</i> | N                                       | N                                       |
| GSM235729     | #39       | <i>BCR-ABL</i> | N                                       | N                                       |
| GSM235664     | #4        | <i>BCR-ABL</i> | N                                       | N                                       |
| GSM235730     | #40       | <i>BCR-ABL</i> | 5'amp->T                                | 3'amp->T                                |

|           |           |                      |                       |                      |
|-----------|-----------|----------------------|-----------------------|----------------------|
| GSM235731 | #41       | <i>BCR-ABL</i>       | 3'del->UPB1           | 5'del->ZER1          |
| GSM235732 | #42       | <i>BCR-ABL</i>       | N                     | N                    |
| GSM235733 | #43       | <i>BCR-ABL</i>       | N                     | N                    |
| GSM235680 | #5        | <i>BCR-ABL</i>       | N                     | 5'del->5'region      |
| GSM235693 | #6        | <i>BCR-ABL</i>       | 3'del->T              | N                    |
| GSM235702 | #7        | <i>BCR-ABL</i>       | N                     | N                    |
| GSM235767 | #8        | <i>BCR-ABL</i>       | 5'amp->T              | 3'amp->T             |
| GSM235812 | #9        | <i>BCR-ABL</i>       | N                     | N                    |
| GSM236531 | #10-AP    | <i>CML(BCR-ABL1)</i> | N                     | N                    |
| GSM236532 | #10-CP    | <i>CML(BCR-ABL1)</i> | N                     | N                    |
| GSM236534 | #11-AP    | <i>CML(BCR-ABL1)</i> | N                     | N                    |
| GSM236533 | #11-CP    | <i>CML(BCR-ABL1)</i> | N                     | N                    |
| GSM236536 | #12-AP    | <i>CML(BCR-ABL1)</i> | N                     | N                    |
| GSM236535 | #12-CP    | <i>CML(BCR-ABL1)</i> | N                     | N                    |
| GSM236537 | #12-CP2   | <i>CML(BCR-ABL1)</i> | N                     | N                    |
| GSM236538 | #13-CP    | <i>CML(BCR-ABL1)</i> | N                     | N                    |
| GSM236539 | #13-CP2   | <i>CML(BCR-ABL1)</i> | N                     | N                    |
| GSM236540 | #14-BC    | <i>CML(BCR-ABL1)</i> | N                     | N                    |
| GSM236541 | #14-Rem   | <i>CML(BCR-ABL1)</i> | N                     | N                    |
| GSM236544 | #15-BC    | <i>CML(BCR-ABL1)</i> | N                     | N                    |
| GSM236542 | #15-CP    | <i>CML(BCR-ABL1)</i> | N                     | N                    |
| GSM236543 | #15-CP2   | <i>CML(BCR-ABL1)</i> | N                     | N                    |
| GSM236547 | #16-BC    | <i>CML(BCR-ABL1)</i> | N                     | N                    |
| GSM236548 | #16-BC-GL | <i>CML(BCR-ABL1)</i> | N                     | N                    |
| GSM236545 | #16-CP    | <i>CML(BCR-ABL1)</i> | N                     | N                    |
| GSM236546 | #16-CP2   | <i>CML(BCR-ABL1)</i> | N                     | N                    |
| GSM236550 | #17-AP    | <i>CML(BCR-ABL1)</i> | 5'amp->T              | 3'amp->T             |
| GSM236549 | #17-CP    | <i>CML(BCR-ABL1)</i> | N                     | N                    |
| GSM236551 | #18-BC    | <i>CML(BCR-ABL1)</i> | N                     | N                    |
| GSM236553 | #19-BC    | <i>CML(BCR-ABL1)</i> | 5'amp->T              | 3'amp->T             |
| GSM236554 | #19-BC-GL | <i>CML(BCR-ABL1)</i> | N                     | N                    |
| GSM236552 | #19-CP    | <i>CML(BCR-ABL1)</i> | N                     | N                    |
| GSM236511 | #1-BC     | <i>CML(BCR-ABL1)</i> | N                     | N                    |
| GSM236510 | #1-CP     | <i>CML(BCR-ABL1)</i> | N                     | N                    |
| GSM236556 | #20-AP    | <i>CML(BCR-ABL1)</i> | N                     | N                    |
| GSM236557 | #20-BC    | <i>CML(BCR-ABL1)</i> | N                     | N                    |
| GSM236555 | #20-CP    | <i>CML(BCR-ABL1)</i> | N                     | N                    |
| GSM236558 | #21-CP    | <i>CML(BCR-ABL1)</i> | N                     | N                    |
| GSM236559 | #21-CP2   | <i>CML(BCR-ABL1)</i> | N                     | N                    |
| GSM236561 | #22-BC    | <i>CML(BCR-ABL1)</i> | 5'amp->T;3'del->IGLL1 | 5'del->CDK9;3'amp->T |
| GSM236562 | #22-BC-GL | <i>CML(BCR-ABL1)</i> | N                     | N                    |
| GSM236560 | #22-CP    | <i>CML(BCR-ABL1)</i> | 3'del->IGLL1          | 5'del->CDK9          |

|           |           |                      |               |                 |
|-----------|-----------|----------------------|---------------|-----------------|
| GSM236564 | #23-BC    | <i>CML(BCR-ABL1)</i> | N             | N               |
| GSM236565 | #23-BC-GL | <i>CML(BCR-ABL1)</i> | N             | N               |
| GSM236563 | #23-CP    | <i>CML(BCR-ABL1)</i> | N             | N               |
| GSM236512 | #2-CP     | <i>CML(BCR-ABL1)</i> | N             | N               |
| GSM236513 | #2-CP2    | <i>CML(BCR-ABL1)</i> | N             | N               |
| GSM236514 | #3-AP     | <i>CML(BCR-ABL1)</i> | N             | N               |
| GSM236515 | #3-BC     | <i>CML(BCR-ABL1)</i> | N             | 3'amp->T        |
| GSM236518 | #4-BC     | <i>CML(BCR-ABL1)</i> | N             | N               |
| GSM236516 | #4-CP     | <i>CML(BCR-ABL1)</i> | N             | N               |
| GSM236517 | #4-Rem    | <i>CML(BCR-ABL1)</i> | N             | N               |
| GSM236521 | #5-BC     | <i>CML(BCR-ABL1)</i> | N             | N               |
| GSM236520 | #5-BC-GL  | <i>CML(BCR-ABL1)</i> | N             | N               |
| GSM236519 | #5-Rem    | <i>CML(BCR-ABL1)</i> | N             | N               |
| GSM236524 | #6-BC     | <i>CML(BCR-ABL1)</i> | 5'amp->T      | 3'amp?->T       |
| GSM236523 | #6-BC-GL  | <i>CML(BCR-ABL1)</i> | N             | N               |
| GSM236522 | #6-CP     | <i>CML(BCR-ABL1)</i> | N             | N               |
| GSM236526 | #7-BC     | <i>CML(BCR-ABL1)</i> | N             | N               |
| GSM236525 | #7-CP     | <i>CML(BCR-ABL1)</i> | N             | N               |
| GSM236528 | #8-AP     | <i>CML(BCR-ABL1)</i> | N             | N               |
| GSM236527 | #8-CP     | <i>CML(BCR-ABL1)</i> | N             | N               |
| GSM236529 | #9-BC     | <i>CML(BCR-ABL1)</i> | N             | N               |
| GSM236530 | #9-BC-GL  | <i>CML(BCR-ABL1)</i> | N             | N               |
| GSM235579 | #1        | <i>E2A-PBX1</i>      | 5'del->T      | 3'amp->T        |
| GSM235776 | #10       | <i>E2A-PBX1</i>      | 5'del->T      | 3'amp->T        |
| GSM235789 | #11       | <i>E2A-PBX1</i>      | 5'del?->T     | 3'amp->T        |
| GSM235804 | #12       | <i>E2A-PBX1</i>      | 5'del->T      | 3'amp->T        |
| GSM235813 | #13       | <i>E2A-PBX1</i>      | 5'del->T      | 3'amp->T        |
| GSM235820 | #14       | <i>E2A-PBX1</i>      | 5'del->T      | 3'amp->T        |
| GSM235854 | #15       | <i>E2A-PBX1</i>      | 5'del->T      | 3'amp->T        |
| GSM235859 | #16       | <i>E2A-PBX1</i>      | 5'del->T      | 3'amp->T        |
| GSM235861 | #17       | <i>E2A-PBX1</i>      | 5'del->T      | 3'amp->T        |
| GSM235602 | #2        | <i>E2A-PBX1</i>      | 5'del->T      | 3'amp->T        |
| GSM235620 | #3        | <i>E2A-PBX1</i>      | 5'del->T      | 3'amp->T        |
| GSM235625 | #4        | <i>E2A-PBX1</i>      | 5'del?->T     | 3'amp->T        |
| GSM235632 | #5        | <i>E2A-PBX1</i>      | 5'del?->T     | 3'amp->T        |
| GSM235641 | #6        | <i>E2A-PBX1</i>      | 5'del->T      | 3'amp->T        |
| GSM235650 | #7        | <i>E2A-PBX1</i>      | 5'del->T      | 3'amp->T        |
| GSM235668 | #8        | <i>E2A-PBX1</i>      | N             | N               |
| GSM235701 | #9        | <i>E2A-PBX1</i>      | 5'del?->T     | 3'amp->T        |
| GSM235670 | #10       | <i>PAX5-ETV6</i>     | PAX5:3'del->T | ETV6:5'del->T   |
| GSM235611 | #3        | <i>PAX5-ZNF521</i>   | PAX5:3'del->T | ZNF521:5'del->T |
| GSM235631 | #1        | <i>MLL-</i>          | N             | N               |

|           |     |                   |                        |                 |
|-----------|-----|-------------------|------------------------|-----------------|
| GSM235846 | #10 | <i>MLL</i> -      | N                      | N               |
| GSM235866 | #11 | <i>MLL</i> -      | N                      | N               |
| GSM235563 | #12 | <i>MLL</i> -      | N                      | N               |
| GSM235578 | #13 | <i>MLL</i> -      | N                      | N               |
| GSM235627 | #15 | <i>MLL</i> -      | N                      | N               |
| GSM235673 | #16 | <i>MLL</i> -      | N                      | MLLT3 5'del->C  |
| GSM235712 | #17 | <i>MLL</i> -      | N                      | N               |
| GSM235742 | #18 | <i>MLL</i> -      | N                      | N               |
| GSM235746 | #19 | <i>MLL</i> -      | N                      | N               |
| GSM235633 | #2  | <i>MLL</i> -      | 3'del->HYOU1           | AFF1 int del    |
| GSM235818 | #20 | <i>MLL</i> -      | 3'del->BCL9L           | N               |
| GSM235847 | #21 | <i>MLL</i> -      | N                      | N               |
| GSM235855 | #22 | <i>MLL</i> -      | N                      | N               |
| GSM235869 | #23 | <i>MLL</i> -      | N                      | N               |
| GSM235652 | #3  | <i>MLL</i> -      | 3'del->CBL             | N               |
| GSM235662 | #4  | <i>MLL</i> -      | N                      | N               |
| GSM235768 | #5  | <i>MLL</i> -      | N                      | N               |
| GSM235780 | #6  | <i>MLL</i> -      | N                      | N               |
| GSM235851 | #7  | <i>MLL</i> -      | N                      | N               |
| GSM235834 | #8  | <i>MLL</i> -      | N                      | AFF1 int del    |
| GSM235837 | #9  | <i>MLL</i> -      | N                      | N               |
| GSM235828 | #14 | <i>PAX5-FOXP1</i> | PAX5:3'del->PTPRD      | FOXP1:N         |
| GSM235561 | #1  | <i>PAX5-ETV6</i>  | PAX5:3'del->T          | ETV6:5'del->T   |
| GSM235566 | #1  | <i>TEL-AML1</i>   | 3'del->3'region        | 5'del->5'region |
| GSM235601 | #10 | <i>TEL-AML1</i>   | N                      | N               |
| GSM235603 | #11 | <i>TEL-AML1</i>   | int del                | N               |
| GSM235605 | #12 | <i>TEL-AML1</i>   | N                      | N               |
| GSM235616 | #13 | <i>TEL-AML1</i>   | N                      | N               |
| GSM235634 | #14 | <i>TEL-AML1</i>   | N                      | N               |
| GSM235642 | #15 | <i>TEL-AML1</i>   | N                      | N               |
| GSM235653 | #16 | <i>TEL-AML1</i>   | N                      | N               |
| GSM235654 | #17 | <i>TEL-AML1</i>   | N                      | N               |
| GSM235658 | #18 | <i>TEL-AML1</i>   | N                      | N               |
| GSM235661 | #19 | <i>TEL-AML1</i>   | N                      | N               |
| GSM235567 | #2  | <i>TEL-AML1</i>   | N                      | N               |
| GSM235672 | #20 | <i>TEL-AML1</i>   | 3'del->chr12:028840592 | 3'amp->JAM2     |
| GSM235674 | #21 | <i>TEL-AML1</i>   | int del                | N               |
| GSM235684 | #22 | <i>TEL-AML1</i>   | 3'del->3'region        | N               |
| GSM235685 | #23 | <i>TEL-AML1</i>   | N                      | N               |
| GSM235688 | #24 | <i>TEL-AML1</i>   | int del                | N               |
| GSM235696 | #25 | <i>TEL-AML1</i>   | N                      | N               |
| GSM235699 | #26 | <i>TEL-AML1</i>   | int del                | N               |

|                  |            |                 |                        |                    |
|------------------|------------|-----------------|------------------------|--------------------|
| GSM235704        | #27        | TEL-AML1        | N                      | N                  |
| GSM235705        | #28        | TEL-AML1        | N                      | N                  |
| GSM235708        | #29        | TEL-AML1        | N                      | N                  |
| GSM235570        | #3         | TEL-AML1        | N                      | 5'del->TCC3        |
| GSM235754        | #30        | TEL-AML1        | N                      | 5'del->5'region    |
| GSM235760        | #31        | TEL-AML1        | N                      | N                  |
| GSM235761        | #32        | TEL-AML1        | N                      | N                  |
| GSM235762        | #33        | TEL-AML1        | N                      | N                  |
| GSM235764        | #34        | TEL-AML1        | 3'del->chr12:017224159 | N                  |
| GSM235770        | #35        | TEL-AML1        | N                      | N                  |
| <b>GSM235772</b> | <b>#36</b> | <b>TEL-AML1</b> | <b>5'del-&gt;T</b>     | <b>5'amp-&gt;T</b> |
| GSM235774        | #37        | TEL-AML1        | N                      | N                  |
| GSM235779        | #38        | TEL-AML1        | 3'del->C               | N                  |
| GSM235788        | #39        | TEL-AML1        | 3'del->CDKN1B          | N                  |
| GSM235571        | #4         | TEL-AML1        | N                      | N                  |
| GSM235794        | #40        | TEL-AML1        | N                      | N                  |
| GSM235800        | #41        | TEL-AML1        | 3'del->LRP6            | N                  |
| GSM235816        | #42        | TEL-AML1        | N                      | N                  |
| GSM235821        | #43        | TEL-AML1        | N                      | N                  |
| GSM235827        | #44        | TEL-AML1        | N                      | N                  |
| GSM235835        | #45        | TEL-AML1        | 3'del->BICD1           | 3'amp->T           |
| GSM235857        | #46        | TEL-AML1        | N                      | N                  |
| GSM235862        | #47        | TEL-AML1        | N                      | N                  |
| GSM235845        | #48        | TEL-AML1        | N                      | int del            |
| GSM235576        | #5         | TEL-AML1        | N                      | N                  |
| GSM235581        | #6         | TEL-AML1        | N                      | N                  |
| GSM235582        | #7         | TEL-AML1        | int del                | N                  |
| GSM235585        | #8         | TEL-AML1        | N                      | N                  |
| GSM235597        | #9         | TEL-AML1        | N                      | N                  |

**Supplementary Table 6. The summary of the genomic imbalances associated with gene fusions identified from the 36 leukemia cell lines.** Note: “N”, no change; “amp”, amplification; “del”, deletion; “T”, telomere; “C”, centromere; “->” denotes the other end of the segmental amplification or deletion not generating the fusion. The case contradicting the principle was marked with bold and italic.

| GEO accession    | Sample ID     | Fusion                     | Copy number aberration at 5' gene locus    | Copy number aberration at 3' gene locus |
|------------------|---------------|----------------------------|--------------------------------------------|-----------------------------------------|
| GSM236815        | #BV173        | <i>BCR-ABL1</i>            | 5'amp->IGL@                                | 5'del->C                                |
| GSM236820        | #K-562        | <i>BCR-ABL1</i>            | 5'amp->T                                   | 3'amp->NUP214                           |
| GSM236836        | #OP1          | <i>BCR-ABL1</i>            | N                                          | N                                       |
| GSM236840        | #SD1          | <i>BCR-ABL1</i>            | N                                          | 5'del->5'region                         |
| GSM236842        | #SUPB-15      | <i>BCR-ABL1</i>            | N                                          | N                                       |
| GSM236843        | #THP-1        | <i>BCR-ABL1</i>            | N                                          | N                                       |
| GSM236844        | #TOM-1        | <i>BCR-ABL1</i>            | N                                          | N                                       |
| GSM236824        | #ME-1         | <i>CBFB-MYH11</i>          | N                                          | N                                       |
| GSM236846        | #UOCB1        | <i>E2A-HLF</i>             | N                                          | N                                       |
| GSM236814        | #AT1          | <i>ETV6-RUNX1</i>          | N                                          | N                                       |
| GSM236823        | #KG-1         | <i>FGFR1OP2-FGFR1</i>      | 5'amp->chr12:02576879<br>2;<br>3'del->AMN1 | 3'amp->chr8:036399366                   |
| GSM236812        | #380          | <i>IGH-BCL2</i>            | int del                                    | N                                       |
| GSM236839        | #RS4_11       | <i>MLL-AF4</i>             | N                                          | N                                       |
| GSM236832        | #MV4-11       | <i>MLL-AF4(AFF1)</i>       | N                                          | N                                       |
| GSM236827        | #ML-2         | <i>MLL-AF6(MLLT4)</i>      | 3'del->T                                   | 5'del->ESR1                             |
| GSM236835        | #NOMO-1       | <i>MLL-AF9</i>             | N                                          | 5'del->chr9:032018982                   |
| <b>GSM236843</b> | <b>#THP-1</b> | <b><i>MLL-AF9</i></b>      | <b>3'amp-&gt;T</b>                         | <b>3'amp-&gt;T</b>                      |
| GSM236831        | #Mono-mac-6   | <i>MLL-AF9(MLLT3)</i>      | N                                          | N                                       |
| GSM236812        | #380          | <i>MYC-IGH</i>             | N                                          | int del                                 |
| GSM236845        | #U-937        | <i>PICALM-AF10(MLLT10)</i> | N                                          | N                                       |
| GSM236834        | #NB4          | <i>PML-RARA</i>            | N                                          | N                                       |
| GSM236821        | #Kasumi-1     | <i>RUNX1-RUNX1T1</i>       | N                                          | N                                       |
| GSM236841        | #SKNO-1       | <i>RUNX1-RUNX1T1</i>       | N                                          | N                                       |
| GSM236816        | #CCRF-CEM     | <i>SIL(STIL)-SCL(TAL1)</i> | N                                          | N                                       |
| GSM236813        | #697          | <i>TCF3-PBX1</i>           | N                                          | 3'amp->T                                |
| GSM236822        | #Kasumi-2     | <i>TCF3-PBX1</i>           | 3'del->T                                   | 3'amp->T                                |
| GSM236826        | #MHH-CALL-3   | <i>TCF3-PBX1</i>           | 3'del->T                                   | 3'amp->T                                |
| GSM236838        | #Reh          | <i>TEL-AML1</i>            | whole gene del                             | 5'amp->T                                |



**Supplementary Table 7. Analysis and curation results of the public array CGH/array SNP/tiling CGH data with gene fusions associated from publications.** ASPS, Alveolar soft part sarcoma; DFSP, Dermatofibrosarcoma Protuberans; AML, Acute Myelogenous Leukemia; ALL, Acute Lymphoblastic Lymphoma; EWS, Ewing's sarcoma; NHL, non-hodgkin lymphoma; AST, Brain Astrocytoma; LUG, Lung Carcinoma; CaP, Prostate Adenocarcinoma; SPA, Salivary Pleomorphic Adenoma.

| GEO accession/<br>Pubmed ID | Cancer     | GSM<br>accession | Sample ID | Fusion                 | DNA<br>Breakpoint<br>Pattern ID | Copy number<br>abberation at 5'<br>gene locus | Copy number<br>abberation at 3'<br>gene locus |
|-----------------------------|------------|------------------|-----------|------------------------|---------------------------------|-----------------------------------------------|-----------------------------------------------|
| GSE9611                     | ALL        | GSM243107        | #1        | <i>BCR-ABL1</i>        | --                              | N                                             | N                                             |
| GSE9611                     | ALL        | GSM243108        | #2        | <i>BCR-ABL1</i>        | #1                              | 5'amp->T;<br>3'del->LOC51233                  | 5'del->CCBL1;<br>3'amp->OBP2B                 |
| GSE9611                     | ALL        | GSM243109        | #3        | <i>BCR-ABL1</i>        | #2                              | 5'amp->T                                      | N                                             |
| GSE9611                     | ALL        | GSM243110        | #4        | <i>BCR-ABL1</i>        | --                              | N                                             | N                                             |
| GSE9611                     | ALL        | GSM243111        | #5        | <i>BCR-ABL1</i>        | #2                              | 5'amp->T                                      | N                                             |
| GSE9611                     | ALL        | GSM243112        | #6        | <i>BCR-ABL1</i>        | #3                              | 5'amp->T                                      | int del                                       |
| GSE9611                     | ALL        | GSM243113        | #7        | <i>BCR-ABL1</i>        | --                              | N                                             | N                                             |
| <b>GSE9611</b>              | <b>ALL</b> | <b>GSM243114</b> | <b>#8</b> | <b><i>BCR-ABL1</i></b> | <b>#4</b>                       | <b>3'amp-&gt;T</b>                            | <b>5'amp-&gt;C</b>                            |
| GSE9611                     | ALL        | GSM243115        | #9        | <i>BCR-ABL1</i>        | --                              | N                                             | N                                             |
| GSE9611                     | ALL        | GSM243116        | #10       | <i>BCR-ABL1</i>        | --                              | N                                             | N                                             |
| GSE9611                     | ALL        | GSM243119        | #13       | <i>IGH-MYC</i>         | #5                              | 3'del->T                                      | N                                             |
| GSE9611                     | ALL        | GSM243120        | #14       | <i>IGH-MYC</i>         | --                              | N                                             | N                                             |
| GSE7255                     | ALL        | GSM174868        | 9348 (#1) | <i>MLL-AF6</i>         | #6                              | 3'del->CBL                                    | N                                             |
| GSE7255                     | ALL        | GSM174860        | 9225(#2)  | <i>MLL-AF4</i>         | #7                              | 3'del->DDX6                                   | 5'del->LOC442777                              |
| GSE7255                     | ALL        | GSM174830        | 9256(#3)  | <i>ETV6-RUNX1</i>      | --                              | N                                             | N                                             |
| GSE7255                     | ALL        | GSM174846        | 9418(#4)  | <i>ETV6-RUNX1</i>      | #8                              | 5'amp->T                                      | N                                             |
| GSE7255                     | ALL        | GSM174851        | 9367(#5)  | <i>ETV6-RUNX1</i>      | --                              | N                                             | N                                             |
| GSE7255                     | ALL        | GSM174852        | 9393(#6)  | <i>E2A-PBX1</i>        | #9                              | N                                             | 3'amp->T                                      |
| GSE8918                     | NHL        | GSM226057        | FL# 1     | <i>lgH-BCL2(90%)</i>   | --                              | N                                             | N                                             |
| GSE8918                     | NHL        | GSM226058        | FL# 2     | <i>lgH-BCL2(90%)</i>   | --                              | N                                             | N                                             |
| GSE8918                     | NHL        | GSM226059        | FL# 3     | <i>lgH-BCL2(90%)</i>   | --                              | N                                             | N                                             |
| GSE8918                     | NHL        | GSM226060        | FL# 4     | <i>lgH-BCL2(90%)</i>   | --                              | N                                             | N                                             |
| GSE8918                     | NHL        | GSM226061        | FL# 5     | <i>lgH-BCL2(90%)</i>   | --                              | N                                             | N                                             |
| GSE8918                     | NHL        | GSM226062        | FL# 6     | <i>lgH-BCL2(90%)</i>   | --                              | N                                             | N                                             |
| GSE8918                     | NHL        | GSM226063        | FL# 7     | <i>lgH-BCL2(90%)</i>   | --                              | N                                             | N                                             |
| GSE8918                     | NHL        | GSM226064        | FL# 8     | <i>lgH-BCL2(90%)</i>   | --                              | N                                             | N                                             |
| GSE8918                     | NHL        | GSM226065        | FL# 9     | <i>lgH-BCL2(90%)</i>   | --                              | N                                             | N                                             |
| GSE8918                     | NHL        | GSM226066        | FL# 10    | <i>lgH-BCL2(90%)</i>   | --                              | N                                             | N                                             |
| GSE8918                     | NHL        | GSM226067        | FL# 11    | <i>lgH-BCL2(90%)</i>   | --                              | N                                             | N                                             |
| GSE8918                     | NHL        | GSM226068        | FL# 12    | <i>lgH-BCL2(90%)</i>   | #12                             | N                                             | 3'amp->T                                      |
| GSE8918                     | NHL        | GSM226069        | FL# 13    | <i>lgH-BCL2(90%)</i>   | #13                             | 3'del?->T                                     | N                                             |
| GSE8918                     | NHL        | GSM226070        | FL# 14    | <i>lgH-BCL2(90%)</i>   | --                              | N                                             | N                                             |
| GSE8918                     | NHL        | GSM226071        | FL# 15    | <i>lgH-BCL2(90%)</i>   | --                              | N                                             | N                                             |

|         |     |           |          |                          |     |              |                |
|---------|-----|-----------|----------|--------------------------|-----|--------------|----------------|
| GSE8918 | NHL | GSM226088 | MCL# 31  | <i>IgH-CCND1(95%)</i>    | #14 | 3'del?->T    | 3'amp->CENTD2  |
| GSE8918 | NHL | GSM226089 | MCL# 32  | <i>IgH-CCND1(95%)</i>    | --  | N            | N              |
| GSE8918 | NHL | GSM226090 | MCL# 33  | <i>IgH-CCND1(95%)</i>    | #15 | 5'amp?->JAG2 | N              |
| GSE8918 | NHL | GSM226091 | MCL# 34  | <i>IgH-CCND1(95%)</i>    | --  | N            | N              |
| GSE8918 | NHL | GSM226092 | MCL# 35  | <i>IgH-CCND1(95%)</i>    | --  | N            | N              |
| GSE8918 | NHL | GSM226093 | MCL# 36  | <i>IgH-CCND1(95%)</i>    | #16 | 3'del?->T    | N              |
| GSE8918 | NHL | GSM226094 | MCL# 37  | <i>IgH-CCND1(95%)</i>    | --  | N            | N              |
| GSE8918 | NHL | GSM226095 | MCL# 38  | <i>IgH-CCND1(95%)</i>    | #17 | N            | 3'amp->UVRAG   |
| GSE8918 | NHL | GSM226096 | MCL# 39  | <i>IgH-CCND1(95%)</i>    | --  | N            | N              |
| GSE8918 | NHL | GSM226097 | MCL# 40  | <i>IgH-CCND1(95%)</i>    | --  | N            | N              |
| GSE8918 | NHL | GSM226098 | MCL# 41  | <i>IgH-CCND1(95%)</i>    | --  | N            | N              |
| GSE8918 | NHL | GSM226099 | MCL# 42  | <i>IgH-CCND1(95%)</i>    | --  | N            | N              |
| GSE8918 | NHL | GSM226100 | MCL# 43  | <i>IgH-CCND1(95%)</i>    | --  | N            | N              |
| GSE8918 | NHL | GSM226101 | MCL# 44  | <i>IgH-CCND1(95%)</i>    | --  | N            | N              |
| GSE8918 | NHL | GSM226111 | LPL# 54  | <i>IgH-PAX5(50%)</i>     | --  | N            | N              |
| GSE8918 | NHL | GSM226112 | LPL# 55  | <i>IgH-PAX5(50%)</i>     | --  | N            | N              |
| GSE8918 | NHL | GSM226113 | LPL# 56  | <i>IgH-PAX5(50%)</i>     | --  | N            | N              |
| GSE8918 | NHL | GSM226114 | LPL# 57  | <i>IgH-PAX5(50%)</i>     | --  | N            | N              |
| GSE8918 | NHL | GSM226115 | LPL# 58  | <i>IgH-PAX5(50%)</i>     | --  | N            | N              |
| GSE8918 | NHL | GSM226116 | LPL# 59  | <i>IgH-PAX5(50%)</i>     | --  | N            | N              |
| GSE8918 | NHL | GSM226117 | LPL# 60  | <i>IgH-PAX5(50%)</i>     | --  | N            | N              |
| GSE8918 | NHL | GSM226118 | LPL# 61  | <i>IgH-PAX5(50%)</i>     | --  | N            | N              |
| GSE8918 | NHL | GSM226119 | LPL# 62  | <i>IgH-PAX5(50%)</i>     | --  | N            | N              |
| GSE8918 | NHL | GSM226120 | LPL# 63  | <i>IgH-PAX5(50%)</i>     | --  | N            | N              |
| GSE8918 | NHL | GSM226136 | MALT# 79 | <i>BIRC3-MALT1(30%)*</i> | --  | N            | N              |
| GSE8918 | NHL | GSM226137 | MALT# 80 | <i>BIRC3-MALT1(30%)*</i> | --  | N            | N              |
| GSE8918 | NHL | GSM226138 | MALT# 81 | <i>BIRC3-MALT1(30%)*</i> | --  | N            | N              |
| GSE8918 | NHL | GSM226139 | MALT# 82 | <i>BIRC3-MALT1(30%)*</i> | --  | N            | N              |
| GSE8918 | NHL | GSM226140 | MALT# 83 | <i>BIRC3-MALT1(30%)*</i> | --  | N            | N              |
| GSE8918 | NHL | GSM226141 | MALT# 84 | <i>BIRC3-MALT1(30%)*</i> | --  | N            | N              |
| GSE8918 | NHL | GSM226142 | MALT# 85 | <i>BIRC3-MALT1(30%)*</i> | --  | N            | N              |
| GSE8918 | NHL | GSM226143 | MALT# 86 | <i>BIRC3-MALT1(30%)*</i> | --  | N            | N              |
| GSE8918 | NHL | GSM226144 | MALT# 87 | <i>BIRC3-MALT1(30%)*</i> | --  | N            | N              |
| GSE8398 | EWS | GSM207892 | # 1      | <i>EWSR1-FLI1</i>        | --  | N            | N              |
| GSE8398 | EWS | GSM207893 | # 2      | <i>EWSR1-FLI1</i>        | --  | N            | N              |
| GSE8398 | EWS | GSM207894 | # 3      | <i>EWSR1-FLI1</i>        | --  | N            | N              |
| GSE8398 | EWS | GSM207895 | # 4      | <i>EWSR1-FLI1</i>        | #19 | N            | 5'del->TMEM135 |
| GSE8398 | EWS | GSM207896 | # 5      | <i>EWSR1-FLI1</i>        | #20 | 5'amp->T     | 3'amp->T       |
| GSE8398 | EWS | GSM207897 | # 6      | <i>EWSR1-FLI1</i>        | --  | N            | N              |
| GSE8398 | EWS | GSM207898 | # 7      | <i>EWSR1-FLI1</i>        | --  | N            | N              |
| GSE8398 | EWS | GSM207899 | # 8      | <i>EWSR1-FLI1</i>        | --  | N            | N              |
| GSE8398 | EWS | GSM207900 | # 9      | <i>EWSR1-FLI1</i>        | --  | N            | N              |

|          |       |           |             |                     |     |             |               |
|----------|-------|-----------|-------------|---------------------|-----|-------------|---------------|
| GSE8398  | EWS   | GSM207901 | # 10        | <i>EWSR1-FLI1</i>   | --  | N           | N             |
| GSE8398  | EWS   | GSM207902 | # 12        | <i>EWSR1-FLI1</i>   | --  | N           | N             |
| GSE8398  | EWS   | GSM207903 | # 13        | <i>EWSR1-FLI1</i>   | --  | N           | N             |
| GSE8398  | EWS   | GSM207904 | # 14        | <i>EWSR1-FLI1</i>   | --  | N           | N             |
| GSE8398  | EWS   | GSM207905 | # 15        | <i>EWSR1-FLI1</i>   | --  | N           | N             |
| GSE8398  | EWS   | GSM207906 | # 16        | <i>EWSR1-FLI1</i>   | --  | N           | N             |
| GSE8398  | EWS   | GSM207907 | # 17        | <i>EWSR1-FLI1</i>   | --  | N           | N             |
| GSE8398  | EWS   | GSM207908 | # 18        | <i>EWSR1-FLI1</i>   | --  | N           | N             |
| GSE8398  | EWS   | GSM207909 | # 19        | <i>EWSR1-FLI1</i>   | --  | N           | N             |
| GSE8398  | EWS   | GSM207910 | # 20        | <i>EWSR1-FLI1</i>   | --  | N           | N             |
| GSE8398  | EWS   | GSM207911 | # 21        | <i>EWSR1-FLI1</i>   | --  | N           | N             |
| GSE8398  | EWS   | GSM207912 | # 22        | <i>EWSR1-FLI1</i>   | --  | N           | N             |
| GSE8398  | EWS   | GSM207913 | # 23        | <i>EWSR1-FLI1</i>   | --  | N           | N             |
| GSE8398  | EWS   | GSM207914 | # 24        | <i>EWSR1-FLI1</i>   | --  | N           | N             |
| GSE8398  | EWS   | GSM207915 | # 25        | <i>EWSR1-FLI1</i>   | --  | N           | N             |
| GSE8398  | EWS   | GSM207916 | # 26        | <i>EWSR1-FLI1</i>   | --  | N           | N             |
| 16193090 | B-NHL | NA        | 581/90(#1)  | <i>IGH-BCL2</i>     | #18 | ?           | 3'amp         |
| 16193090 | B-NHL | NA        | 364/86(#2)  | <i>IGH-BCL2</i>     | #18 | ?           | 3'amp         |
| 16193090 | B-NHL | NA        | 436/91(#3)  | <i>IGH-BCL2</i>     | #18 | ?           | 3'amp         |
| 16193090 | B-NHL | NA        | 176/88(#4)  | <i>IGH-BCL2</i>     | #18 | ?           | 3'amp         |
| 16193090 | B-NHL | NA        | 472/90(#5)  | <i>IGH-BCL2</i>     | #18 | ?           | 3'amp         |
| 16193090 | B-NHL | NA        | 287/88(#6)  | <i>IGH-BCL2</i>     | #18 | ?           | 3'amp         |
| 16193090 | B-NHL | NA        | 21/87(#7)   | <i>IGH-BCL2</i>     | #18 | ?           | 3'amp         |
| 16193090 | B-NHL | NA        | 130/92(#8)  | <i>IGH-BCL2</i>     | --  | ?           | N             |
| 16193090 | B-NHL | NA        | 377/83(#9)  | <i>IGH-BCL2</i>     | --  | ?           | N             |
| 16193090 | B-NHL | NA        | 311/89(#10) | <i>IGH-BCL2</i>     | --  | ?           | N             |
| 16193090 | B-NHL | NA        | 41/88(#11)  | <i>IGH-BCL2</i>     | --  | ?           | N             |
| 16193090 | B-NHL | NA        | 64/89(#12)  | <i>IGH-BCL2</i>     | --  | ?           | N             |
| 16193090 | B-NHL | NA        | 34/90(#13)  | <i>IGH-BCL2</i>     | --  | ?           | N             |
| 16193090 | B-NHL | NA        | 381/88(#14) | <i>IGH-BCL2</i>     | --  | ?           | N             |
| 16193090 | B-NHL | NA        | 140/90(#15) | <i>IGH-BCL2</i>     | --  | ?           | N             |
| 16193090 | B-NHL | NA        | 345/87(#16) | <i>IGH-BCL2</i>     | --  | ?           | N             |
| 16193090 | B-NHL | NA        | 140/90(#17) | <i>IGH-BCL2</i>     | --  | ?           | N             |
| 16193090 | B-NHL | NA        | 345/87(#18) | <i>IGH-BCL2</i>     | --  | ?           | N             |
| 15361874 | T-ALL | NA        | #1          | <i>NUP214-ABL1</i>  | #10 | 5'amp->ABL1 | 3'amp->NUP214 |
| 15361874 | T-ALL | NA        | #2          | <i>NUP214-ABL1</i>  | #10 | 5'amp->ABL1 | 3'amp->NUP214 |
| 15361874 | T-ALL | NA        | #3          | <i>NUP214-ABL1</i>  | #10 | 5'amp->ABL1 | 3'amp->NUP214 |
| 15361874 | T-ALL | NA        | #4          | <i>NUP214-ABL1</i>  | #10 | 5'amp->ABL1 | 3'amp->NUP214 |
| 15361874 | T-ALL | NA        | #5          | <i>NUP214-ABL1</i>  | #10 | 5'amp->ABL1 | 3'amp->NUP214 |
| 15361874 | T-ALL | NA        | #6          | <i>NUP214-ABL1</i>  | #10 | 5'amp->ABL1 | 3'amp->NUP214 |
| 10681437 | AML   | NA        | #1          | <i>MLL-LARG</i>     | #11 | 3'del->LARG | 5'del->MLL    |
| GSE3930  | DFSP  | GSM89915  | STT154(#1)  | <i>COL1A1-PDGFB</i> | #21 | 5'amp       | 3'amp         |

|                      |      |          |             |                      |     |                   |                   |
|----------------------|------|----------|-------------|----------------------|-----|-------------------|-------------------|
| GSE3930              | DFSP | GSM89903 | STT154(#2)  | <i>COL1A1-PDGFB</i>  | #21 | 5'amp             | 3'amp             |
| GSE3930              | DFSP | GSM89916 | STT491(#3)  | <i>COL1A1-PDGFB</i>  | #21 | 5'amp             | 3'amp             |
| GSE3930              | DFSP | GSM89911 | STT491(#4)  | <i>COL1A1-PDGFB</i>  | #21 | 5'amp             | 3'amp             |
| GSE3930              | DFSP | GSM89919 | STT1984(#5) | <i>COL1A1-PDGFB</i>  | #21 | 5'amp             | 3'amp             |
| GSE3930              | DFSP | GSM89904 | STT1984(#6) | <i>COL1A1-PDGFB</i>  | #21 | 5'amp             | 3'amp             |
| GSE3930              | DFSP | GSM89931 | STT1971(#7) | <i>COL1A1-PDGFB</i>  | #22 | 5'amp             | N                 |
| 17124411             | DFSP | NA       | 7 cases     | <i>COL1A1-PDGFB</i>  | #21 | 5'amp in 5 cases  | 3'amp in 3 cases  |
| 11244503             | ASPS | NA       | 12 cases    | <i>ASPSCR1-TFE3</i>  | #23 | 3'del in 9 cases  | 3'amp in 9 cases  |
| 18974108             | AST  | NA       | 29 cases    | <i>KIAA1549-BRAF</i> | #24 | 5'amp in 29 cases | 3'amp in 29 cases |
| 18059337             | SPA  | NA       | 11 cases    | <i>FGFR1-PLG1</i>    | #25 | 5'amp in 10 cases | 3'amp in 10 cases |
| 17654723<br>16951139 | CaP  | NA       | 106 cases   | <i>TMPRSS2-ERG</i>   | #26 | 3'del in 54 cases | 5'amp in 54 cases |

\* In MALT, besides BIRC3-MALT1 reported in 30% cases, there were also IgH-MALT1 reported in 15-20% cases, IgH-FOXP1 in 10% cases and IgH-BCL10 in 5% cases.

**Supplementary Table 8. Meta-analysis of unbalanced gene fusions in multiple human cancers to test the fusion breakpoint principle.** Abbreviations: ALL, acute lymphoblastic leukemia; CML, chronic myelogenous leukemia; AML, acute myelogenous leukemia; NHL, non-Hodgkin's lymphoma; EWS, Ewing's sarcoma; DFSP, dermatofibrosarcoma protruberans; ASPS, Alveolar soft part sarcoma; AST, astrocytoma; SPA, Salivary Pleomorphic Adenoma; CaP, prostate cancer.

| Cancer type   | First Author | Citation                    | Platform             | Total Samples with fusions | Unbalanced | Follow the principle |
|---------------|--------------|-----------------------------|----------------------|----------------------------|------------|----------------------|
| ALL/CML       | Mulighan CG  | Nature 2007;446:758         | Affymetrix 500K aSNP | 185                        | 68         | 66                   |
| ALL           | Paulsson K   | PNAS 2008;105:6708          | Affymetrix 500K aSNP | 13                         | 6          | 5                    |
| ALL           | Kuiper RP    | Leukemia 2007;21:1258       | Affymetrix 100K aSNP | 6                          | 4          | 4                    |
| T-ALL         | Graux C      | Nat Genet 2004;36:1084      | CGH                  | 6                          | 6          | 6                    |
| AML           | Kourlas PJ   | PNAS 2000;97:2145           | CGH                  | 1                          | 1          | 1                    |
| NHL           | Ferreira BI  | Haematologica 2008;93:670   | Agilent 44B aCGH     | 48                         | 8          | 8                    |
| B-NHL         | Galteland E  | Leukemia 2005;19:2313       | BAC aCGH             | 18                         | 7          | 7                    |
| EWS           | Ferreira BI  | Oncogene 2008;27:2084       | Agilent 44B aCGH     | 25                         | 2          | 2                    |
| DFSP          | Linn SC      | Am J Pathol 2003;163:2383   | Standford aCGH       | 7                          | 7          | 7                    |
| DFSP          | Kaur S       | Cytogenet Genome Res. 2006  | Agilent 13k aCGH     | 7                          | 5          | 5                    |
| ASPS          | Ladanyi M    | Oncogene 2001;20:48         | FISH                 | 12                         | 9          | 9                    |
| AST           | Jones DT     | Cancer Res 2008;68:8673     | MHP 1Mb aCGH         | 29                         | 29         | 29                   |
| SPA           | Persson F    | Oncogene 2008;27:3072       | Agilent 44B aCGH     | 11                         | 10         | 10                   |
| CaP           | Liu W        | Gene Chrom Canc 2007;46:972 | Affymetrix 500K aSNP | 41                         | 16         | 16                   |
| CaP           | Pertner S    | Cancer Res 2006;66:8337     | FISH                 | 65                         | 38         | 38                   |
| CaP           | Wang XS      | This study                  | FISH                 | 104                        | 60         | 60                   |
| <b>TOTAL:</b> |              |                             |                      | 578                        | 276        | 273(98.9%)           |

**Supplementary Table 9. Curation of the experimental data suggesting the genomic aberrations for all intra-chromosome gene fusions from the Mitelman database.** “No.”: the number of publications reporting the gene fusions. Note: Amp, segmental amplification, Del: interstitial deletion, inv: inversion. APL, Acute promyelocytic leukemia; AUL, Acute undifferentiated leukemia; CEL, Chronic eosinophilic leukemia; MYE, Myeloproliferative disease; SAR, Sarcoma; LPB, Lipoblastoma; LYM, Lymphoma; F-LYM, Follicular Lymphoma; T-LYM, T-cell Lymphoma; B-LYM, B-cell Lymphoma, M-LYM, Mantle Cell Lymphoma; NLD, Nonneoplastic lymphatic disorder; LPL, Lymphoplasmacytic Lymphoma; THY, Thyroid Adenocarcinoma.

| Gene Fusion         | Cancer Type | Genomic Distance between fusion partners (kb) | Predicted genomic imbalance | Total No. of reports | Pubmed ID of informative reports | Experimental Methods | Curation Results *    |
|---------------------|-------------|-----------------------------------------------|-----------------------------|----------------------|----------------------------------|----------------------|-----------------------|
| <i>MLL/ARHGEF17</i> | AML         | 45055                                         | amp                         | 1                    | --                               | --                   | no information        |
| <i>TPM3/TPR</i>     | THY         | 32118                                         | amp                         | 1                    | --                               | --                   | no information        |
| <i>RPNI/EVII</i>    | AML         | 40433                                         | amp                         | 2                    | --                               | --                   | no information        |
| <i>NUP214/ABL1</i>  | ALL         | 237                                           | amp                         | 1                    | 15361874                         | Tiling CGH           | interstitial amplicon |
| <i>PRKARIA/RARA</i> | APL         | 28252                                         | amp                         | 1                    | 17712046                         | FISH                 | no unbalance info     |
| <i>TCEA1/PLAG1</i>  | SAL         | 2138                                          | amp                         | 2                    | 16736500                         | FISH                 | no unbalance info     |
| <i>MLL/DCPS</i>     | AML         | 7778                                          | del                         | 1                    | --                               | --                   | no information        |

|                      |         |       |     |    |                       |               |                                 |
|----------------------|---------|-------|-----|----|-----------------------|---------------|---------------------------------|
| <i>TFRC/BCL6</i>     | B-LYM   | 8315  | del | 1  | --                    | --            | no information                  |
| <i>HAS2/PLAG1</i>    | LPB     | 65408 | del | 2  | 10987300              | FISH          | bac not locatable               |
| <i>TMPRSS2/ERG</i>   | CaP     | 2803  | del | 10 | 16951139              | aCGH          | interstitial deletion           |
| <i>HNRPA2B1/ETV1</i> | CaP     | 12203 | del | 1  | 17671502              | FISH          | del 3' HNRPA2B1; del 5' ETV1    |
| <i>MLL/CBL</i>       | AML     | 681   | del | 1  | 12696071              | FISH          | del 3'MLL                       |
| <i>MLL/ARHGEF12</i>  | AML     | 1812  | del | 2  | 10681437              | inference     | del 3'MLL; del 5'LARG           |
| <i>FIP1L1/PDGFR</i>  | CEL     | 770   | del | 4  | 12660384,<br>14973504 | FISH          | del internal BAC at CHIC2 locus |
| <i>SET/NUP214</i>    | AML     | 2492  | del | 2  | 17296573              | aCGH          | interstitial deletion           |
| <i>STIL/TAL1</i>     | ALL     | 20    | del | 2  | 8459224               | citation      | interstitial deletion           |
| <i>GOPC/ROS1</i>     | GBM     | 134   | del | 1  | 12661006              | sequencing    | interstitial deletion           |
| <i>MLL/TIRAP</i>     | AML     | 7757  | del | 1  | 15626757              | RT-PCR        | no reciprocal fusion            |
| <i>RET/NCOA4</i>     | THY     | 8297  | del | 4  | --                    | --            | no information                  |
| <i>LPP/BCL6</i>      | B-LYM   | 467   | inv | 1  | --                    | --            | no information                  |
| <i>MLL/BCL9L</i>     | ALL     | 371   | inv | 1  | --                    | --            | no information                  |
| <i>MLL/MAML2</i>     | AML     | 22096 | inv | 1  | --                    | --            | no information                  |
| <i>BCL11B/TRD@</i>   | ALL     | 76700 | inv | 1  | 15668700              | FISH          | balanced inversion              |
| <i>TRA@/TCL1A</i>    | NLD     | 73155 | inv | 1  | 7662982               | FISH          | dup of 5' & 3' TCL1A            |
| <i>RET/CCDC6</i>     | THY     | 18274 | inv | 5  | 1542652               | Southern blot | reciprocal fusion               |
| <i>EML4/ALK</i>      | LUG     | 12252 | inv | 3  | 18083107              | FISH          | del 5'ALK                       |
| <i>EWSR1/PATZ1</i>   | SAR     | 2025  | inv | 1  | 10949935              | RT-PCR        | no reciprocal fusion            |
| <i>MLL/PICALM</i>    | AML;ALL | 32355 | inv | 2  | 12461747              | RT-PCR        | no reciprocal fusion            |
| <i>CHCHD7/PLAG1</i>  | SAL     | 0     | inv | 1  | 16736500              | FISH          | no unbalanced info              |
| <i>AKAP9/BRAF</i>    | THY     | 48503 | inv | 1  | 15630448              | RT-PCR        | reciprocal fusion               |
| <i>TPM3/NTRK1</i>    | THY     | 2621  | inv | 2  | 7590742               | RT-PCR        | reciprocal fusion               |
| <i>AFF1/ELF2</i>     | ALL     | 51917 | inv | 1  | 17410185              | RT-PCR        | three way balanced              |
| <i>DSCAML1/MLL</i>   | ALL     | 639   | inv | 1  | 17410185              | RT-PCR        | three way balanced              |
| <i>FXD6/MLL</i>      | ALL     | 560   | inv | 1  | 17410185              | RT-PCR        | three way balanced              |

\* Amplifications/deletions fit to the prediction from the inferred principle as well as translocations without genomic imbalances are considered as following the inferred principle.

**Supplementary Table 10. The summary of FISH findings for unbalanced ETS gene fusions in 171 prostate cancer cases (UM cohort)**

| Case (n) | 3' ETS Gene | FISH finding                | 5' fusion partner | FISH finding                |
|----------|-------------|-----------------------------|-------------------|-----------------------------|
| 44       | <i>ERG</i>  | 5' deletion                 | <i>TMPRSS2</i>    | 3' deletion                 |
| 4        | <i>ERG</i>  | split                       | <i>TMPRSS2</i>    | 3' deletion                 |
| 3        | <i>ERG</i>  | 5' deletion                 | <i>TMPRSS2</i>    | split                       |
| 5        | <i>ERG</i>  | 5' deletion; 3' duplication | <i>TMPRSS2</i>    | 3' deletion; 5' duplication |
| 1        | <i>ETV1</i> | split                       | <i>HNRPA2B1</i>   | 3' deletion                 |

|   |             |             |                 |             |
|---|-------------|-------------|-----------------|-------------|
| 1 | <i>ETV1</i> | 5' deletion | <i>C15ORF21</i> | split       |
| 1 | <i>ETV4</i> | 5' deletion | <i>TMPRSS2</i>  | split       |
| 1 | <i>ETV4</i> | 5' deletion | <i>CANT1</i>    | 3' deletion |

**Supplementary Table 11. The split-apart probes used for fluorescence in situ hybridization detecting ETS gene rearrangements in prostate cancer.**

| Gene                   | Chromosome band | 5' region    | 3' region    |
|------------------------|-----------------|--------------|--------------|
| <i>ERG</i>             | 21q22.2         | RP11-95I21   | RP11-476D17  |
| <i>ETV1</i>            | 7p21.2          | RP11-703A4   | RP11-124L22  |
| <i>ETV4</i>            | 17q21.31        | RP11-436J4   | RP11-100E5   |
| <i>ETV5</i>            | 3q27.2          | RP11-379C23  | RP11-1144N13 |
| <i>TMPRSS2</i>         | 21q22.3         | RP11-35C4    | RP11-120C17  |
| <i>SLC45A3</i>         | 1q32.1          | RP11-1089F13 | RP11-1143H2  |
| <i>C15ORF21</i>        | 15q21.1         | RP11-474E1   | RP11-626F7   |
| <i>HERV-K_22q11.23</i> | 22q11.23        | RP11-947A12  | RP11-61P17   |
| <i>HNRPA2B1</i>        | 7p15.2          | RP11-379M24  | RP11-11F13   |
| <i>FLJ35294</i>        | 17p13.1         | RP11-1099M24 | RP11-55C13   |
| <i>CANT1</i>           | 17q25.3         | RP11-52K16   | RP11-46K10   |
| <i>KLK2</i>            | 19q13.33        | CTC-771P3    | RP11-26P14   |
| <i>DDX5</i>            | 17q24.1         | RP11-81D7    | RP11-315N9   |

**Supplementary Table 12. Normal tissues from the "Both\_Normal" dataset analyzed using Oncomine database ([www.oncomine.org](http://www.oncomine.org))<sup>20</sup>.** The gene expression data of NFE2 across the 40 normal tissue types indicated in this table are displayed in Supplementary Fig. 9.

| No. | Tissue Type          | Sample Number (n) |
|-----|----------------------|-------------------|
| 1   | Adipose              | 10                |
| 2   | Adrenal Gland Cortex | 4                 |
| 3   | Bone Marrow          | 5                 |
| 4   | Bronchus             | 3                 |
| 5   | Cervix               | 4                 |
| 6   | Colon Cecum          | 3                 |
| 7   | Coronary Artery      | 3                 |
| 8   | Dorsal Root Ganglia  | 8                 |
| 9   | Endometrium          | 4                 |
| 10  | Esophagus            | 4                 |
| 11  | Heart Atrium         | 4                 |
| 12  | Heart Ventricle      | 3                 |
| 13  | Kidney Cortex        | 4                 |
| 14  | Kidney Medulla       | 4                 |
| 15  | Liver                | 4                 |
| 16  | Lymph Nodes          | 4                 |
| 17  | Mammary Gland        | 3                 |
| 18  | Myometrium           | 5                 |
| 19  | Nipple Cross-Section | 4                 |
| 20  | Nodose Nucleus       | 8                 |
| 21  | Oral Mucosa          | 4                 |
| 22  | Ovary                | 4                 |
| 23  | Pharyngeal Mucosa    | 4                 |
| 24  | Pituitary Gland      | 8                 |
| 25  | Prostate Gland       | 3                 |
| 26  | Salivary Gland       | 4                 |
| 27  | Saphenous Vein       | 3                 |
| 28  | Skeletal Muscle      | 5                 |
| 29  | Spleen               | 4                 |
| 30  | Stomach              | 11                |
| 31  | Testes               | 3                 |
| 32  | Thyroid Gland        | 4                 |
| 33  | Tongue               | 8                 |
| 34  | Tonsil               | 3                 |
| 35  | Trachea              | 3                 |
| 36  | Trigeminal Ganglia   | 8                 |
| 37  | Urethra              | 3                 |
| 38  | Vagina               | 4                 |
| 39  | Vulva                | 4                 |
| 40  | Lung                 | 3                 |



## References

1. Hu, Z. et al. VisANT 3.0: new modules for pathway visualization, editing, prediction and construction. *Nucleic Acids Res* **35**, W625-632 (2007).
2. Ono, Y., Fukuhara, N. & Yoshie, O. TAL1 and LIM-only proteins synergistically induce retinaldehyde dehydrogenase 2 expression in T-cell acute lymphoblastic leukemia by acting as cofactors for GATA3. *Mol Cell Biol* **18**, 6939-6950 (1998).
3. Thorsteinsdottir, U., Kroon, E., Jerome, L., Blasi, F. & Sauvageau, G. Defining roles for HOX and MEIS1 genes in induction of acute myeloid leukemia. *Mol Cell Biol* **21**, 224-234 (2001).
4. Sampietro, J. et al. Crystal structure of a beta-catenin/BCL9/Tcf4 complex. *Mol Cell* **24**, 293-300 (2006).
5. Senyuk, V. et al. The leukemia-associated transcription repressor AML1/MDS1/EV11 requires CtBP to induce abnormal growth and differentiation of murine hematopoietic cells. *Oncogene* **21**, 3232-3240 (2002).
6. Janknecht, R. Regulation of the ER81 transcription factor and its coactivators by mitogen- and stress-activated protein kinase 1 (MSK1). *Oncogene* **22**, 746-755 (2003).
7. Maki, K., Yamagata, T. & Mitani, K. Role of the RUNX1-EV11 fusion gene in leukemogenesis. *Cancer Sci* **99**, 1878-1883 (2008).
8. Hart, S.M. & Foroni, L. Core binding factor genes and human leukemia. *Haematologica* **87**, 1307-1323 (2002).
9. Wishart, D.S. et al. DrugBank: a comprehensive resource for in silico drug discovery and exploration. *Nucleic Acids Res* **34**, D668-672 (2006).
10. Kharas, M.G. et al. Ablation of PI3K blocks BCR-ABL leukemogenesis in mice, and a dual PI3K/mTOR inhibitor prevents expansion of human BCR-ABL+ leukemia cells. *J Clin Invest* **118**, 3038-3050 (2008).
11. Garcia-Manero, G. et al. Phase 1 study of the histone deacetylase inhibitor vorinostat (suberoylanilide hydroxamic acid [SAHA]) in patients with advanced leukemias and myelodysplastic syndromes. *Blood* **111**, 1060-1066 (2008).
12. Dunleavy, K. Phase I/II Study of Flavopiridol in Patients With Refractory or Recurrent Mantle Cell Lymphoma or Diffuse Large B-Cell Lymphoma. *NCI - Center for Cancer Research: NCI-07-C-0081* (2007-2009).
13. Odero, M.D., Zeleznik-Le, N.J., Chinwalla, V. & Rowley, J.D. Cytogenetic and molecular analysis of the acute monocytic leukemia cell line THP-1 with an MLL-AF9 translocation. *Genes Chromosomes Cancer* **29**, 333-338 (2000).
14. Persson, F. et al. High-resolution array CGH analysis of salivary gland tumors reveals fusion and amplification of the FGFR1 and PLAG1 genes in ring chromosomes. *Oncogene* (2007).
15. Perner, S. et al. TMPRSS2:ERG fusion-associated deletions provide insight into the heterogeneity of prostate cancer. *Cancer Res* **66**, 8337-8341 (2006).
16. Liu, W. et al. Multiple genomic alterations on 21q22 predict various TMPRSS2/ERG fusion transcripts in human prostate cancers. *Genes Chromosomes Cancer* **46**, 972-980 (2007).
17. Jones, D.T. et al. Tandem duplication producing a novel oncogenic BRAF fusion gene defines the majority of pilocytic astrocytomas. *Cancer Res* **68**, 8673-8677 (2008).
18. Mitelman F, J.B.a.M.F.E. Mitelman Database of Chromosome Aberrations in Cancer. (2007).
19. Richard, W. <https://array.nci.nih.gov/caarray/project/woost-00041>.
20. Rhodes, D.R. et al. Oncomine 3.0: genes, pathways, and networks in a collection of 18,000 cancer gene expression profiles. *Neoplasia* **9**, 166-180 (2007).
